1 **CRISPRa screen on a genetic risk locus shared by multiple autoimmune diseases**  
2 **identifies a dysfunctional enhancer that affects *IRF8* expression through**  
3 **cooperative lncRNA and DNA methylation machinery**

4  
5 Tian Zhou<sup>1,2,3</sup>, Xinyi Zhu<sup>1</sup>, Zhizhong Ye<sup>3</sup>, Yongfei Wang<sup>4</sup>, Chao Yao<sup>5</sup>, Ning Xu<sup>1</sup>, Mi  
6 Zhou<sup>6</sup>, Jianyang Ma<sup>1</sup>, Yuting Qin<sup>1</sup>, Yiwei Shen<sup>1</sup>, Yuanjia Tang<sup>1</sup>, Zhihua Yin<sup>3</sup>, Hong  
7 Xu<sup>7,8</sup>, Yutong Zhang<sup>1</sup>, Xiaoli Zang<sup>1</sup>, Huihua Ding<sup>1</sup>, Wanling Yang<sup>4</sup>, Ya Guo<sup>6</sup>, John B.  
8 Harley<sup>9</sup>, Bahram Namjou<sup>10</sup>, Kenneth M. Kaufman<sup>10,11,12</sup>, Leah C. Kottyan<sup>10,12,13</sup>,  
9 Matthew T. Weirauch<sup>10,12,14,15</sup>, Guojun Hou<sup>1,2,3\*</sup>, Nan Shen<sup>1,2,3,10,12\*</sup>

10  
11 <sup>1</sup>Shanghai Institute of Rheumatology, Renji Hospital, Shanghai Jiao Tong University  
12 School of Medicine (SJTUSM), Shanghai, China, 200001.

13 <sup>2</sup>State Key Laboratory of Oncogenes and Related Genes, Shanghai Cancer Institute,  
14 Renji Hospital, Shanghai Jiao Tong University School of Medicine (SJTUSM),  
15 Shanghai, China, 200032.

16 <sup>3</sup>Shenzhen Futian Hospital for Rheumatic Diseases, Shenzhen, China, 518040.

17 <sup>4</sup>Department of Paediatrics and Adolescent Medicine, The University of Hong Kong,  
18 Hong Kong, China, 999077.

19 <sup>5</sup>Shanghai Institute of Nutrition and Health, Shanghai Institutes for Biological Sciences  
20 (SIBS), University of Chinese Academy of Sciences, Chinese Academy of Sciences  
21 (CAS), Shanghai, China, 200031.

22 <sup>6</sup>Sheng Yushou Center of Cell Biology and Immunology, Joint International Research  
23 Laboratory of Metabolic & Developmental Sciences, School of Life Sciences and  
24 Biotechnology, Shanghai Jiao Tong University (SJTU), Shanghai, China, 200240.

25 <sup>7</sup>Department of Obstetrics and Gynecology, Renji Hospital, Shanghai Jiao Tong  
26 University School of Medicine (SJTUSM), Shanghai, China, 200127.

27 <sup>8</sup>Shanghai Key Laboratory of Gynecologic Oncology, Renji Hospital, Shanghai Jiao  
28 Tong University School of Medicine (SJTUSM), Shanghai, China, 200127.

29 <sup>9</sup>US Department of Veterans Affairs Medical Center, Cincinnati, Ohio, 45229, USA.

30 <sup>10</sup>Center for Autoimmune Genomics and Etiology, Cincinnati Children's Hospital  
31 Medical Center, Cincinnati, Ohio, USA, 45229.

32 <sup>11</sup>Division of Immunobiology, Cincinnati Children's Hospital Medical Center,  
33 Cincinnati, Ohio, 45229, USA.

34 <sup>12</sup>Department of Pediatrics, University of Cincinnati College of Medicine, Cincinnati,  
35 Ohio, USA, 45229.

36 <sup>13</sup>Division of Allergy and Immunology, Cincinnati Children's Hospital Medical Center,  
37 Cincinnati, Ohio, 45229, USA.

38 <sup>14</sup>Division of Developmental Biology, Cincinnati Children's Hospital Medical Center,  
39 Cincinnati, Ohio, 45229, USA

40 <sup>15</sup>Division of Biomedical Informatics, Cincinnati Children's Hospital Medical Center,  
41 Cincinnati, Ohio, 45229, USA.

42

43 \*Correspondence: Dr. Nan Shen or Guojun Hou

44 Shanghai Institute of Rheumatology, Renji Hospital, School of Medicine, Shanghai Jiao  
45 Tong University, 145 Shan Dong Middle Road, Shanghai, China, 200001.

46 Telephone: +86-021-68385620

47 Fax: +86-021-68385620

48 Email address: [nanshensibs@gmail.com](mailto:nanshensibs@gmail.com).

49

## 50 **Abstract**

51 Dysregulated transcription factors represent a major class of drug targets that  
52 mediate the abnormal expression of many critical genes involved in SLE and other  
53 autoimmune diseases. Although strong evidence suggests that natural human genetic  
54 variation affects basal and inducible gene expression, it is still a considerable challenge  
55 to establish a biological link between GWAS-identified non-coding genetic risk variants

56 and their regulated gene targets. Here, we combine genetic data, epigenomic data, and  
57 CRISPR activation (CRISPRa) assays to screen for functional variants regulating *IRF8*  
58 expression. Using CRISPR-mediated deletion and 3D chromatin structure analysis, we  
59 demonstrate that the locus containing rs2280381 is a cell-type-specific distal enhancer  
60 for *IRF8* that spatially interacts with the *IRF8* promoter. Further, rs2280381 mediates  
61 *IRF8* expression through enhancer RNA *AC092723.1*, which recruits TET1 to the *IRF8*  
62 promoter to modulate *IRF8* expression by affecting methylation levels. The alleles of  
63 rs2280381 modulate PU.1 binding and chromatin state to differentially regulate  
64 *AC092723.1* and *IRF8* expression. Our work illustrates a strategy to define the  
65 functional genetic variants modulating transcription factor gene expression levels and  
66 identifies the biologic mechanism by which autoimmune diseases risk genetic variants  
67 contribute to the pathogenesis of disease.

## 68 **Introduction**

69 Transcription factors (TFs) are specialized proteins that bind to sequence-specific  
70 DNA sequences to activate or inhibit gene transcription<sup>1</sup>. TFs contribute to the control  
71 the gene-expression pattern of each cell type and the determination of cell fate<sup>2,3</sup>.  
72 Emerging evidence reveals that abnormally expressed TFs can contribute to  
73 dysregulation of the immune system, and ultimately to the development of autoimmune  
74 diseases in mice and humans<sup>3-5</sup>. Studies using TF knockout mice, such as *IRF5*, have  
75 directly revealed a critical role for TFs in the pathogenesis and severity of autoimmune  
76 diseases<sup>6</sup>. Moreover, inhibition of TFs can effectively intervene disease development,  
77 making TFs attractive therapeutic targets in many diseases<sup>7-9</sup>.

78        The expression levels of many genes differ among individuals, with genetic  
79        variants likely making important contributions<sup>10-12</sup>. In particular, genetic variants can  
80        alter the expression of genes encoding TFs, thus resulting in alterations to the  
81        downstream expression levels of genes controlled by a particular TF<sup>13-15</sup>. For example,  
82        *BCL11A* plays a key role in the repression of  $\gamma$ -globin expression and fetal hemoglobin  
83        in erythroid cells. Genome-wide association studies (GWAS) have identified genetic  
84        variants in the *BCL11A* locus that are associated with fetal hemoglobin expression  
85        levels, and targeting *BCL11A* can prevent or ameliorate the complications of sickle cell  
86        disease by regulating  $\gamma$ -globin expression levels<sup>15,16</sup>. Dissecting the impact of functional  
87        genetic variants on TF expression thus can help to shed light on the mechanisms  
88        underlying abnormal expression of transcription factors in disease, especially for  
89        diseases with a genetic predisposition.

90        Autoimmune diseases are a class of complex heterogeneous disease that are  
91        broadly caused by an immune response against self<sup>17</sup>. Many autoimmune diseases, such  
92        as systemic lupus erythematosus (SLE), have genetic predisposition<sup>18-20</sup>. Abnormal  
93        expression of transcription factors leading to the dysregulation of multiple signaling  
94        pathways is thought to extensively contribute to autoimmune disease development<sup>21,22</sup>.  
95        However, little autoimmune disease risk genetic variants have been directly connected  
96        to transcription factor expression levels. This is because genetic variants identified  
97        through GWAS are not necessarily causal due to linkage disequilibrium (LD)<sup>18</sup>.  
98        Moreover, the majority of variants are located in non-coding genomic regions, and thus  
99        are more likely to act in a cell or context-dependent manner<sup>23-26</sup>. In addition, disease

100 risk genes are usually defined based on genomic proximity or expression quantitative  
101 trait loci (eQTL) signal, which do not necessarily identify the causal genes.

102 To fill this gap, we present a strategy for deciphering the mechanism of genetic  
103 regulation of transcription factor expression in diseases, using *IRF8* as an example.  
104 *IRF8* has been nominated as an important autoimmune disease risk gene by multiple  
105 genetic studies<sup>27-34</sup>. Consistent with this notion, *IRF8* function is linked to multiple  
106 autoimmune-related phenotypes, such as immune cell development, inflammatory  
107 cytokine production and regulation of IFN-stimulated gene (ISG) expression<sup>35-37</sup>.  
108 Despite the presence of strong genetic associations in the *IRF8* locus, the functional  
109 variants, causal genes, and underlying gene regulatory mechanism involved in  
110 autoimmune disease are largely unclear. Here, we integrated genetic data, epigenomic  
111 analysis, CRISPR activation (CRISPRa) screens, CRISPR-mediated knockout and 3D  
112 chromatin structure analysis to identify the functional variants in the *IRF8* locus. We  
113 demonstrate that rs2280381 is likely a causal variant that regulates *IRF8* expression by  
114 modulating enhancer RNA expression and cell-type specific enhancer-promoter  
115 looping interactions. Furthermore, the enhancer RNA interacts with TET1, which binds  
116 to the *IRF8* promoter and modulates its methylation levels to regulate *IRF8* expression.  
117 In particular, rs2280381 alleles differentially affect transcription factor occupancy and  
118 chromatin state to fine-tune the expression of *IRF8*, thus contributing to disease  
119 pathogenesis.

## 120 **Results**

### 121 **CRISPR activation screen identifies the functional autoimmune diseases**

122 **associated genetic variants in the *IRF8* locus**

123 *IRF8* locus is strongly associated with autoimmune diseases, including Bechet's  
124 disease (BD)<sup>34</sup>, rheumatoid arthritis (RA)<sup>38,39</sup>, systemic sclerosis (SSc)<sup>40,41</sup>, systemic  
125 lupus erythematosus (SLE)<sup>28,29,32,42</sup> and multiple sclerosis (MS)<sup>27,43,44</sup>. GWAS have  
126 reported at least 16 genetic variants that are genome-wide significantly associated with  
127 autoimmune disease in this locus<sup>27-29,32,34,38-44</sup>. However, the functional variants are  
128 currently unknown. To prioritize autoimmune diseases risk variants with potential  
129 regulatory function on *IRF8* expression, we developed a strategy to screen the genetic  
130 variants with CRISPR activation assays using gRNAs targeting the SNP-containing  
131 region. We first collected all autoimmune disease associated genetic variants with  
132 genome-wide significance ( $P < 5 \times 10^{-8}$ ) published through 2020<sup>27-29,32,34,38-44</sup> (Fig. 1A  
133 and Supplementary Data Set 1). To include all possible disease-associated variants, we  
134 further included all SNPs in tight LD ( $r^2 > 0.8$ ) with these tag variants according to the  
135 population, identifying 89 SNPs in total (Supplementary Data Set 1). Since GWAS  
136 variants are mostly located in non-coding regions of the genome, and variants impacting  
137 gene regulation are often located within enhancer regions, we analysed active enhancer  
138 signals including H3K27ac modification, DNase I hypersensitive sites (DHSs) and  
139 chromatin accessibility (ATAC-seq) of the above SNPs in 4 major human immune cell  
140 subsets. SNPs with high H3K27ac, DNase-seq, or ATAC-seq signal in any immune cell  
141 subset were considered as candidates (Fig. 1B). This procedure identified 32 candidate  
142 genetic variants (Supplementary Data Set 1). Among these SNPs, 18 SNPs are located  
143 in monocyte-specific enhancers, with the remaining SNPs mostly occurring in shared

144 enhancer regions of CD4+ T cells, CD8+ T cells, CD19+ B cells and CD14+ Monocytes  
145 (Supplementary data set 1 and Fig. 1C). Interestingly, nearly all of these candidate SNP-  
146 containing regions are enhancers in CD14+ monocytes (Supplementary Data Set 1 and  
147 Fig. 1C). Based on the above observations, we decided to perform our functional screen  
148 assays in monocytes.

149 To begin functionally identifying the regulatory potential of these SNPs, we first  
150 established stable cells expressing dCas9-VP64 in U-937 monocyte cells. Three gRNAs  
151 around each SNP were designed and synthesized. The gRNA mixture was then  
152 transfected into the cells for 24 hours and *IRF8* mRNA expression levels were measured  
153 (Fig. 1B). The results show that 13 variant-harboring regions could induce greater than  
154 1.4-fold increases in *IRF8* expression levels, with the SLE risk SNP rs2280381-  
155 containing region having the strongest regulatory effect among these SNPs (1.97-fold,  
156 which is close to the effect of activating the *IRF8* promoter region) (Fig. 1D). Moreover,  
157 rs2280381 is located within a monocyte-specific enhancer (Fig. 1E). Based on these  
158 results, we focused our study on rs2280381 and SLE.

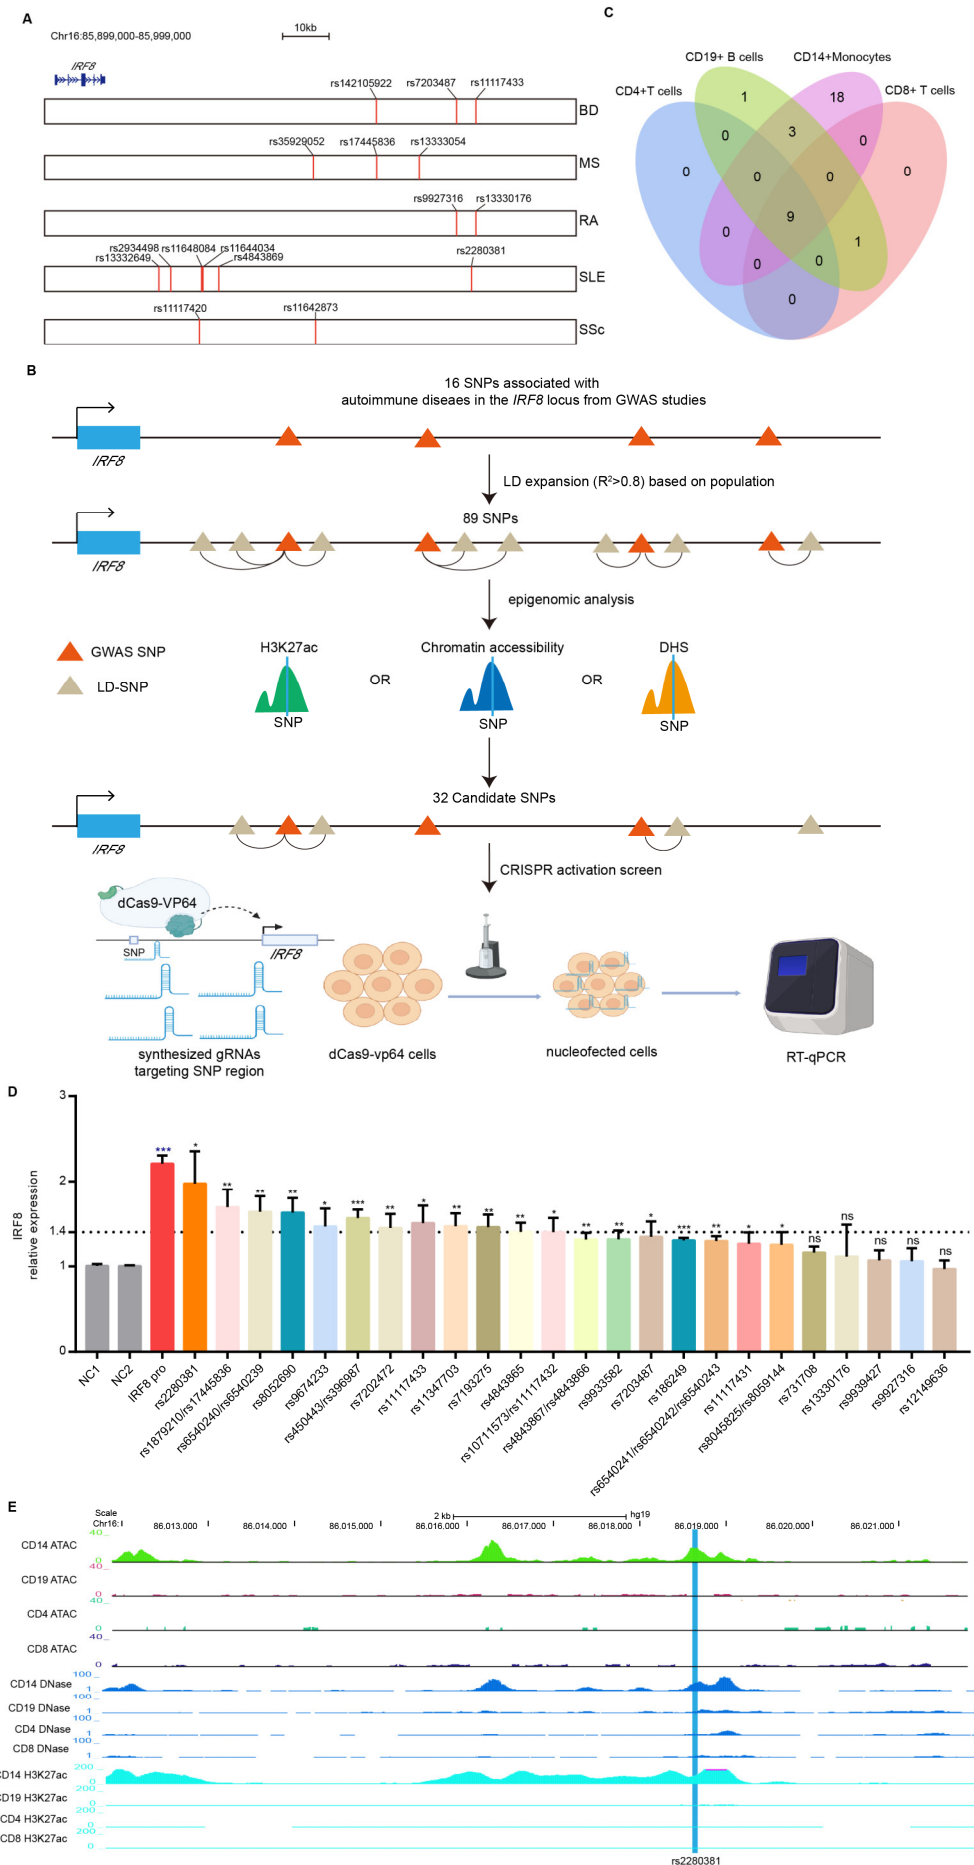



160 **Fig. 1 CRISPR activation screen reveals functional genetic variants modulating**  
161 ***IRF8* expression.** (A) The position of GWAS tag SNPs (shared x-axis indicated above)  
162 with respect to the *IRF8* gene for many autoimmune diseases (y-axis). (B) Strategy for  
163 choosing candidate autoimmune disease-associated SNPs for the CRISPR activation  
164 screen. DHS, DNase I hypersensitive site. (C) Venn diagram indicating the overlap of  
165 SNPs with gene regulatory region signals among different human immune cell subsets.  
166 (D) RT-qPCR analysis of *IRF8* expression in the CRISPR activation experiment (n = 3,  
167 biological replicates). (E) Chromatin landscape analysis reveals that rs2280381 is  
168 located within a likely cell-type-specific enhancer. Data are represented as mean ± SEM  
169 and *P*-values are calculated using an unpaired two tailed Student's t-test. \**P* < 0.05;  
170 \*\**P* < 0.01; \*\*\**P* < 0.001, ns, no significant difference.

171

172 **The rs2280381-containing enhancer regulates *IRF8* expression in a cell-type-**  
173 **dependent manner through an enhancer-promoter connection**

174 CRISPR/Cas9 mediated deletion is a widely used tool for the study of enhancer  
175 function. To directly evaluate the regulatory function of the rs2280381-containing  
176 region, we generated cell clones with a roughly 138-bp deletion at the rs2280381 site  
177 using the CRISPR/Cas9 technology in U-937 cells (Fig. 2A and 2B). The clones  
178 underwent the same procedure, but with the wildtype genotype used as a control. As  
179 expected, deletion of the fragment harboring rs2280381 dramatically reduced *IRF8*  
180 expression, both at the mRNA and protein level (Fig. 2C and 2D). Further, we also  
181 examined the enhancer mark signals in this region by ChIP-qPCR (Fig. 2E) and

182 chromatin accessibility by FAIRE-qPCR in U-937 cells (Fig. 2F), revealing that this  
183 chromatin region is open and highly modified with H3K27ac and H3K4me1 marks.  
184 These data together indicate that the rs2280381-containing region is a functional  
185 enhancer regulating *IRF8* expression in U-937 cells.

186 Distal enhancers usually form enhancer-promoter loops affecting target gene  
187 expression. To test whether such a connection exists between the *IRF8* promoter and  
188 the rs2280381 enhancer, we conducted circularized chromosome conformation capture  
189 sequencing (4C-seq) assays to detect looping interactions to the *IRF8* promoter within  
190 this region. These experiments revealed a physical looping interaction between the  
191 rs2280381 enhancer and the *IRF8* promoter (Fig. 2G). In addition, this observation was  
192 further corroborated based on the rs2280381 view point (Fig. 2H).

193 Since enhancers are often cell-type-specific, and our data suggest that the  
194 rs2280381 enhancer is a monocyte-specific enhancer, we next sought to define in which  
195 cell type this region possesses regulatory function. To this end, we first deleted the  
196 rs2280381-containing region in Raji (B cell) and Jurkat (T cell) lines, and found that  
197 deletion of this region has no effect on *IRF8* expression (Fig.2I and 2J). Next, we  
198 isolated CD14<sup>+</sup> monocytes, CD3<sup>+</sup>T cells and CD19<sup>+</sup> B cells from human PBMCs and  
199 disrupted the rs2280381 region by delivering Cas9 RNP into these cells. After editing,  
200 the cells were collected to extract RNA and genomic DNA. The editing efficacy was  
201 estimated using ICE (<https://ice.synthego.com/#/>). Through analysis of the Sanger  
202 sequencing results of the target locus and efficiency, up to >30% sample (Fig. S1) was  
203 chosen to inspect gene expression. As shown in Fig.2K-M, disruption of the rs2280381-

204 containing region only affects *IRF8* expression in monocytes. This is consistent with  
205 the observed epigenetic modifications (Fig.1E) in these immune cells. Collectively,  
206 these data suggest that the genomic region harboring rs2280381 is a cell-type-specific  
207 enhancer that forms enhancer-promoter interactions to modulate *IRF8* expression.

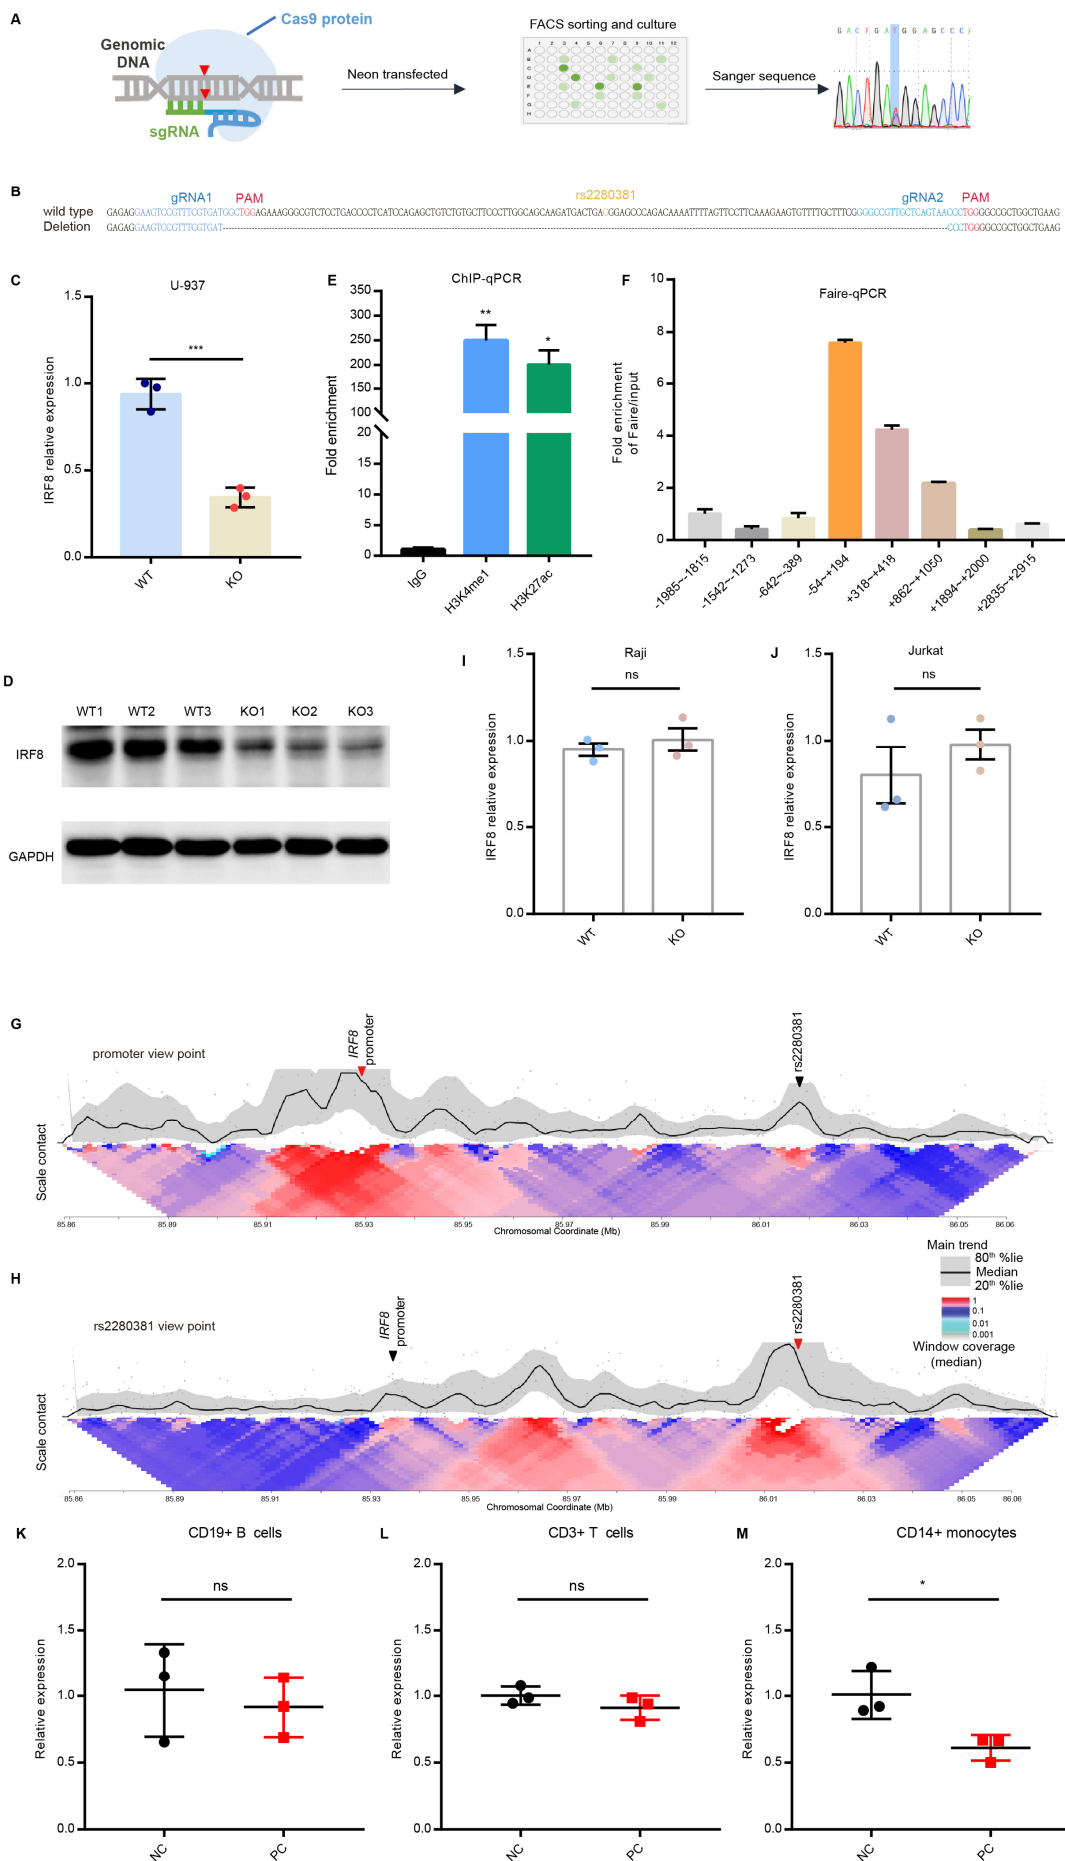

209 **Fig. 2. The rs2280381-containing region is a cell-type-dependent enhancer**  
210 **regulating *IRF8* expression. (A)** Flow chart for generating genomic fragment deletion  
211 clones using the CRISPR-Cas9 technology. **(B)** The genotype of rs2280381 wildtype  
212 clones and deletion clones. **(C)** RT-qPCR analysis of *IRF8* expression in U-937 WT and  
213 KO clones (n = 3, biological sample replicates). WT: rs2280381 wildtype, KO: 138 bp  
214 fragment harbouring the rs2280381 deletion. **(D)** WB analysis of *IRF8* expression in  
215 U-937 WT and deletion clones. WT: rs2280381 wildtype, KO: 138 bp fragment  
216 harbouring the rs2280381 deletion. **(E)** Analysis of active enhancer signals (H3K4me1  
217 and H3K27ac) within the rs2280381-containing region in U-937 cells by ChIP-qPCR  
218 (n = 3, biological replicates). **(F)** FAIRE-qPCR analysis of chromatin accessibility  
219 within the rs2280381-containing region. (n = 3, biological replicates). **(G-H)** 4C-seq  
220 analysis of contact profiles of the *IRF8* promoter site (G) and rs2280381 site (H) using  
221 a 2 kb window size in the main trend subpanel. Red arrow heads indicate the view point  
222 position, and black arrow heads indicate the target position. Gray dots indicate  
223 normalized contact intensities. Heat map displays a set of medians of normalized  
224 contact intensities calculated at different window sizes. **(I-J)** RT-qPCR analysis of *IRF8*  
225 expression in Raji (I) or Jurkat (J) WT and KO clones (n = 3, biological sample  
226 replicates). **(K-M)** RT-qPCR analysis of *IRF8* expression in CRISPR/Cas9 RNP edited  
227 CD19<sup>+</sup> B cells (K), CD3<sup>+</sup> T cells (L) and CD14<sup>+</sup> monocytes (M) (n = 3, biological  
228 samples replicates). Data are represented as mean ± SEM and *P*-values are calculated  
229 using an unpaired two tailed Student's t-test (C, E-F, I-J) and paired two tailed Student's  
230 t-test (K-M). \**P* < 0.05; \*\**P* < 0.01; \*\*\**P* < 0.001.

231

232 **LncRNA *AC092723.1* near rs2280381 functions as an enhancer RNA regulating**  
233 ***IRF8* expression**

234 To identify further downstream targets of the rs2280381-containing region and  
235 identify other genes in the locus that might be regulated by the region, we performed  
236 RNA-seq on three WT and three KO clones. We then performed differential gene  
237 expression analysis, identifying 59 and 199 genes significantly downregulated and  
238 upregulated (log<sub>2</sub> fold-change of  $\geq 1.2$  and false discovery rate (FDR) cutoff  $\leq 0.05$ )  
239 by deletion of this region, respectively (Fig. S2A and Supplementary data set 2). Gene  
240 ontology (GO) analysis revealed that differentially expressed genes are highly enriched  
241 in expected biological process such as inflammatory response, response to interferon-  
242 alpha, LPS or virus, innate immune response, etc. (Fig. S2B and Supplementary data  
243 set 2), which is in concordance with the established functions of IRF8<sup>35</sup>.

244 Interestingly, examination of the expression of genes within the 1-Mb window of  
245 rs2280381 revealed that the expression level of a lncRNA, *AC092723.1*, was also  
246 down-regulated in rs2280381 KO cell clones (Fig. S2C). This observation was  
247 validated by RT-qPCR analysis (Fig. 3A). In addition, use of the CRISPR SAM  
248 activation system targeting the rs2280381-containing region by gRNA strongly  
249 upregulated both *AC092723.1* and *IRF8* expression (Fig. 3B-C). *AC092723.1* is located  
250 downstream of rs2280381, with the distance between rs2280381 and the 3' end of  
251 *AC092723.1* being approximately 300 bp (Fig. 3D). Epigenomic analysis indicates that  
252 the genomic region of *AC092723.1* overlaps with a broad monocyte specific likely

253 enhancer with strong H3K4me1, H3K27ac, and DHS signal and high chromatin  
254 accessibility (Fig. S2D). Based on these observations, we hypothesized that  
255 *AC092723.1* may act as an enhancer RNA (eRNA) mediating the regulation of  
256 rs2280381 on *IRF8* expression.

257 Since lncRNA expression levels are often tissue or cell specific, we first  
258 investigated *AC092723.1* abundance in different human immune cell subsets.  
259 Consistent with the chromatin landscape in this region, *AC092723.1* is highly expressed  
260 in human CD14<sup>+</sup> monocytes (Fig. 3E). This was also validated by public RNA-  
261 sequencing data in different immune cell subsets (Fig. S2E). Further, we detected its  
262 intracellular localization through cell fractionation followed by RT-qPCR in U-937 cells  
263 and observed that *AC092723.1* is mainly distributed in the nuclear fraction (Fig. 3F),  
264 which is similar to most regulatory lncRNAs. To directly evaluate the regulatory  
265 function of *AC092723.1*, we knocked down this lncRNA by ASO and tested *IRF8*  
266 expression in U-937 cells. As shown in Fig. 3G-H, knock down of *AC092723.1*  
267 significantly reduced *IRF8* expression. In contrast, knockdown of *IRF8* by siRNA did  
268 not decrease *AC092723.1* expression (Fig. 3I-J). We further confirmed this result by  
269 deleting part of the *AC092723.1* region by CRISPR/Cas9 mediated fragment deletion  
270 in U-937 cells (Fig. S2F and Fig. 3K). Collectively, these data provide direct evidence  
271 that the rs2280381 enhancer governs eRNA *AC092723.1* expression to modulate *IRF8*  
272 expression.

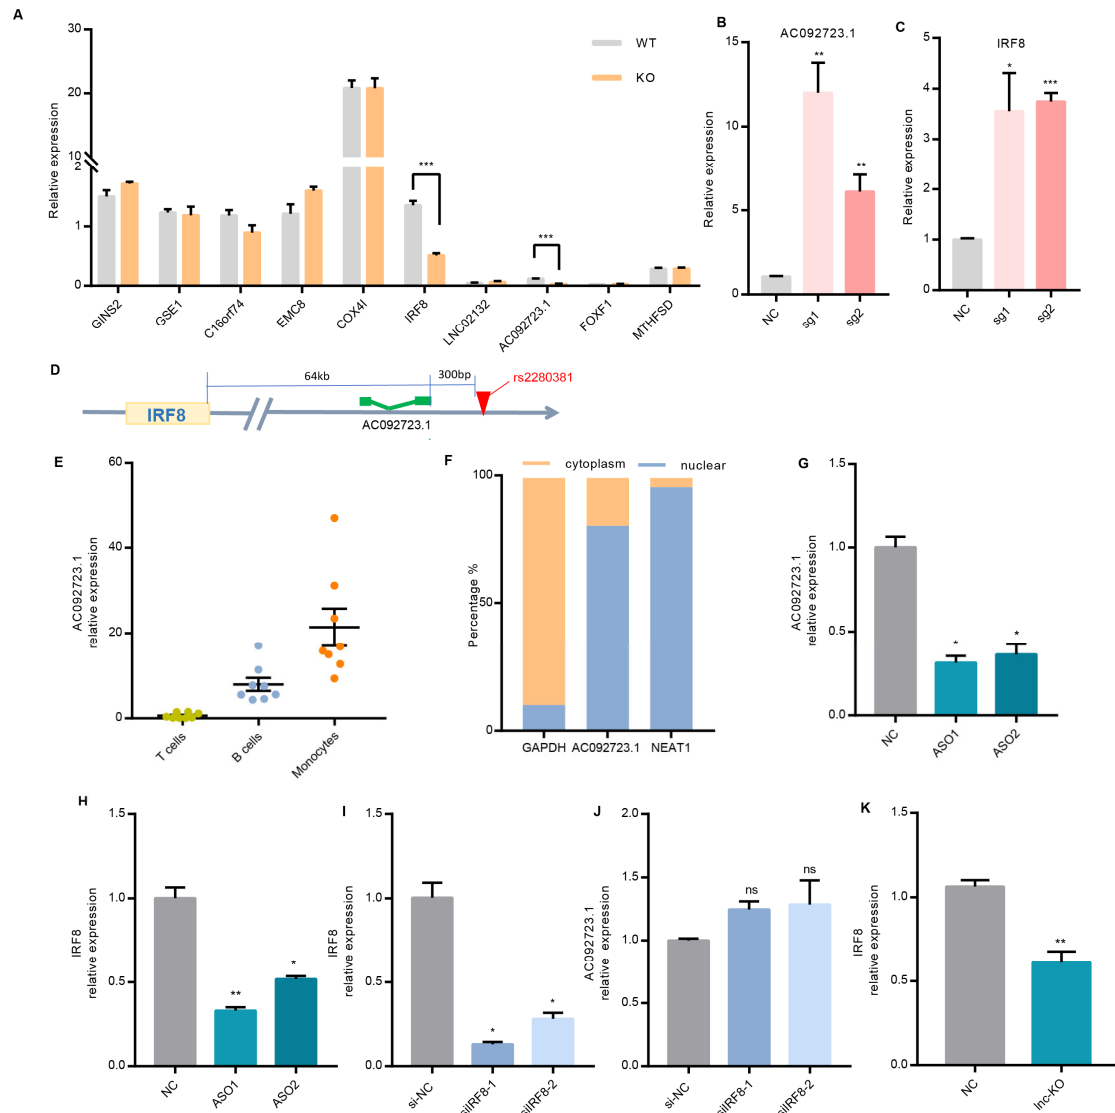

273

274 **Fig. 3** *AC092723.1* mediates the effect of the rs2280381-containing region on *IRF8*

275 **expression.** (A) RT-qPCR analysis of the expression of nearby genes within the 1-Mb

276 window of rs2280381 in U-937 WT clones and KO clones (n = 3, biological sample

277 replicates). (B-C) CRISPR SAM assay increases *AC092723.1* and *IRF8* expression by

278 targeting the rs2280381-containing region using specific gRNA in U-937 cells (n = 3,

279 biological replicates). (D) The relative locations of rs2280381, *AC092723.1* and *IRF8*.

280 (E) *AC092723.1* expression in different human immune cell subsets as measured by

281 RT-qPCR. (F) RT-qPCR analysis of *AC092723.1* abundance in U-937 nuclear and

282 cytoplasmic fractions. *GAPDH*, cytoplasmic marker. *NEAT1*, nuclear marker. (G-H)



283 RT-qPCR analysis of *AC092723.1* and *IRF8* expression with or without *AC092723.1*  
284 knockdown. **(I-J)** RT-qPCR analysis of *AC092723.1* and *IRF8* expression with or  
285 without *IRF8* knockdown. **(K)** RT-qPCR analysis of *IRF8* expression after deletion of  
286 part region of *AC092723.1* by CRISPR-Cas9. Data are represented as mean  $\pm$  SEM and  
287 *P*-values are calculated using an unpaired two tailed Student's t-test. \**P* < 0.05; \*\**P* <  
288 0.01; \*\*\**P* < 0.001.

289

290 ***AC092723.1* interacts with the TET1 protein and binds to the *IRF8* promoter,**  
291 **regulating *IRF8* expression by influencing methylation levels**

292 To explore the mechanism by which *AC092723.1* *cis*-regulates *IRF8* expression,  
293 we first carried out a chromatin isolation by RNA purification (ChIRP) assay<sup>45</sup> to  
294 evaluate the interaction between the lncRNA and the *IRF8* promoter. We designed  
295 biotinylated antisense oligonucleotides tilling the whole lncRNA sequence and  
296 incubated these probes with chromatin fractions from U-937 cells. The core binding  
297 sequence within the *IRF8* promoter was assessed by RT-qPCR (Fig. 4A). Five pairs of  
298 PCR primers were designed spanning from -1000 to +153 relative to the *IRF8*  
299 transcription start site, which include all of the high chromatin accessibility regions (Fig.  
300 S3). Compared to the control GAPDH group, lncRNA probes strongly and specifically  
301 enriched *AC092723.1* mRNA compared to *GAPDH* mRNA (Fig. 4B-C). More  
302 importantly, analysis of the DNA sequences pulled down by *AC092723.1* probes  
303 revealed significant enrichment at the -473/-395 *IRF8* promoter sequence (Fig. 4D and  
304 Fig. S3). In addition, we also found that *AC092723.1* could interact with the rs2280381-

305 containing region (Fig. 4E), which suggests that *AC092723.1* may contribute to loop  
306 formation between the *IRF8* promoter and the rs2280381 enhancer (Fig.4F).

307 Recent studies have demonstrated that many lncRNAs can function as scaffolds  
308 for chromatin-modifying enzymes that regulate chromatin epigenetic modifications to  
309 enhance or suppress gene expression<sup>46,47</sup>. To test whether *AC092723.1* can interact with  
310 epigenetic modifying enzymes, we first used a bioinformatics algorithm  
311 (<http://pridb.gdcb.iastate.edu/RPISeq/references.php>)<sup>48,49</sup> to predict possible binding  
312 epigenetic modifying enzymes. Since *AC092723.1* is a positive regulator of *IRF8*  
313 expression, we focused our candidates on chromatin modifiers with the potential  
314 function of activating gene expression: WDR5, EP300, TET1 and DOT1L (Fig. 4G).  
315 To test these candidate modifiers, we performed RNA binding protein  
316 immunoprecipitation assays (RIP) with antibodies specific to each of the above  
317 chromatin modifiers. As shown in Fig. 4H, only the anti-TET1 antibody enriched for  
318 high abundance of *AC092723.1* relative to the IgG control.

319 Next, we investigated whether TET1 plays a functional role with *AC092723.1* in  
320 regulating *IRF8* expression. We used siRNA knockdown of *TET1* in U-937 cells and  
321 performed RT-qPCR analysis to evaluate the knockdown efficiency and *IRF8*  
322 expression levels. The results show that silencing of *TET1* significantly down-regulated  
323 *IRF8* expression (Fig. 4I). Further, to elucidate how the *AC092723.1*-TET1 complex  
324 modulates *IRF8* expression, we detected the enrichment of TET1 in the *IRF8* promoter  
325 region by performing chromatin immunoprecipitation (ChIP) assays in U-937 cells with  
326 or without lncRNA knockdown. The results indicate that TET1 can directly bind to the

327 *IRF8* promoter region, and this binding activity is impaired in *AC092723.1* KD cells  
328 (Fig.4J), implying that *AC092723.1* functions as a scaffold recruiting TET1 to the *IRF8*  
329 promoter region.

330 TET1 is an important chromatin-modifying enzyme that causes DNA  
331 demethylation, thus activating gene expression<sup>50</sup>. To test whether TET1 acts in this  
332 fashion to control *IRF8* expression, we examined the methylation level of the *IRF8*  
333 promoter region after silencing *AC092723.1* expression. As expected, the methylation  
334 level in the promoter region significantly increased upon *AC092723.1* KD (Fig. 4K).  
335 Taken together, these data suggest that *AC092723.1* interacts with TET1 to limit the  
336 methylation levels in the *IRF8* promoter region, leading to the activation of *IRF8*  
337 transcription.

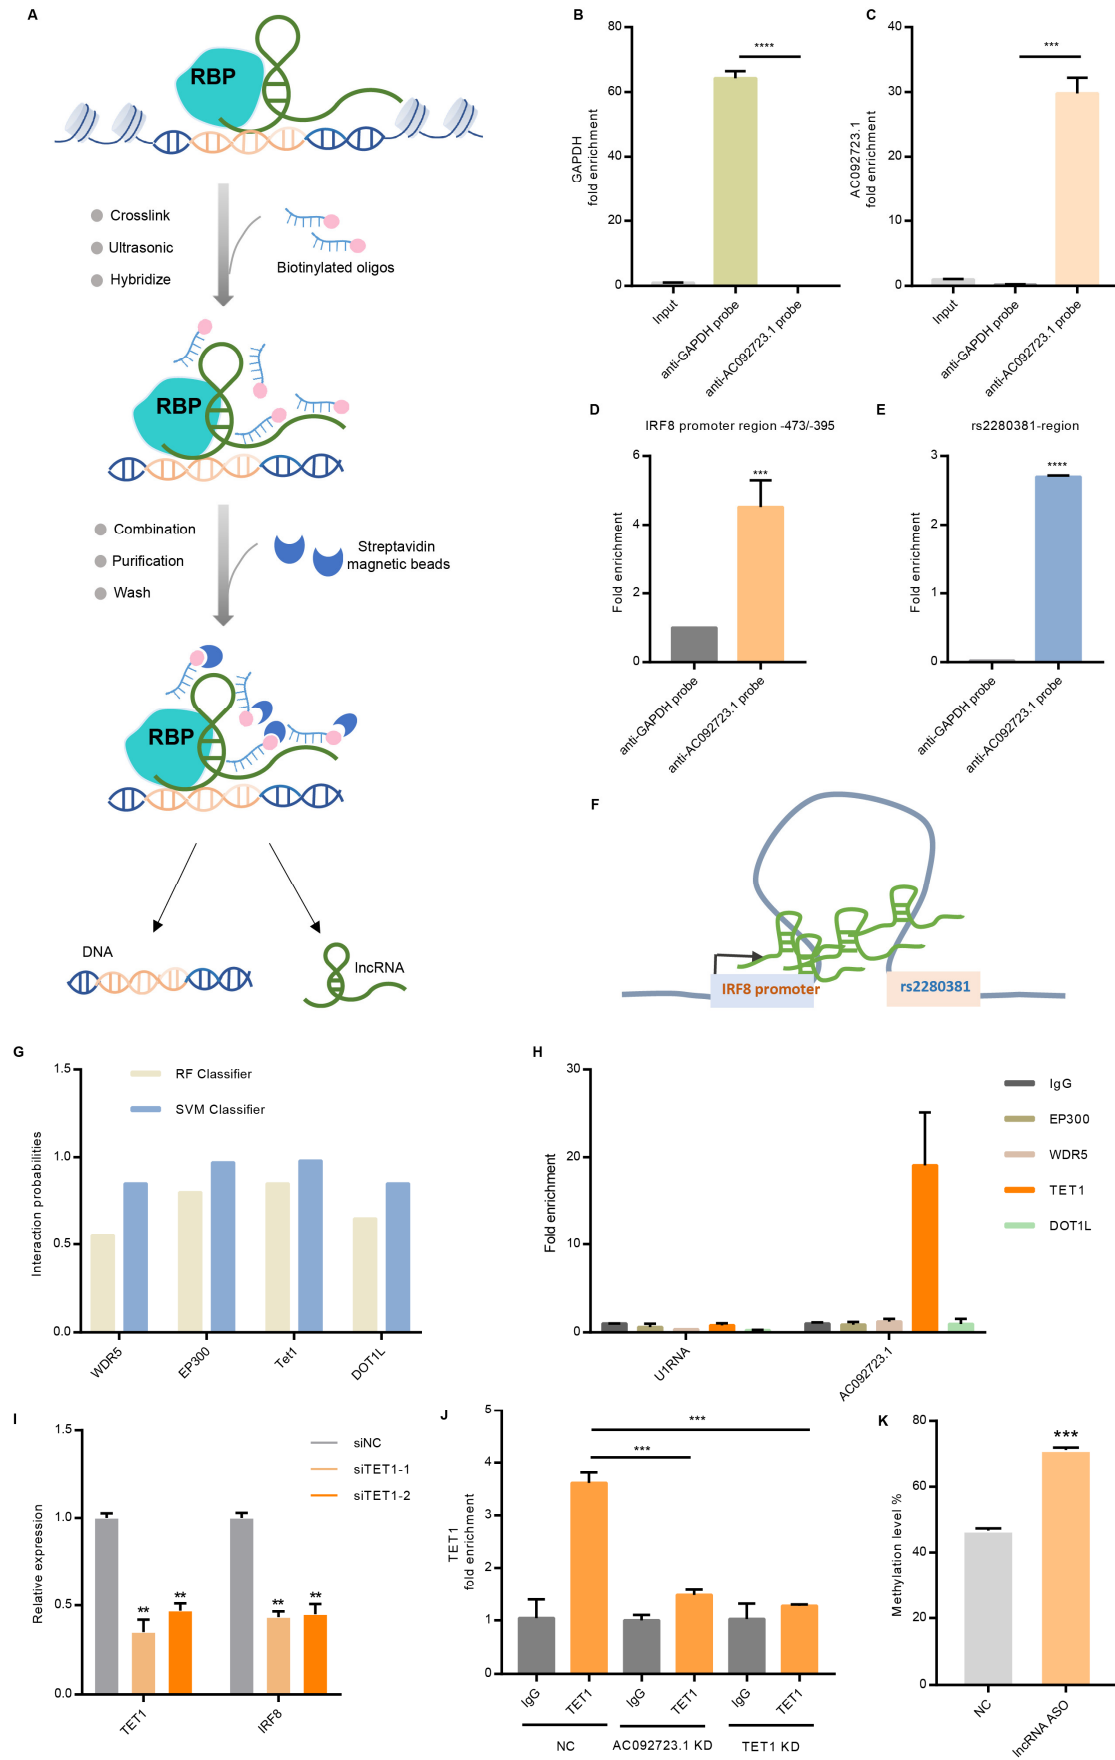

338

339 **Fig. 4. AC092723.1 binds to the IRF8 promoter, where it recruits TET1 and affects**

340 **promoter methylation levels. (A)** Flow scheme for the ChIRP assay detecting the  
341 interaction between the *IRF8* promoter region and *AC092723.1*, RBP: RNA-binding  
342 protein. **(B-C)** *GAPDH* mRNA and *AC092723.1* RNA are specifically enriched with  
343 anti-GAPDH probes and anti-*AC092723.1* probes in ChIRP assays, respectively (n = 3,  
344 biological replicates). **(D-E)** *AC092723.1* interacts with the *IRF8* promoter region (D)  
345 and rs2280381 containing region (E) (n = 3, biological replicates). **(F)** Model for  
346 *AC092723.1* contribution to loop formation between the *IRF8* promoter region and the  
347 rs2280381 region. **(G)** Bioinformatic analysis of *AC092723.1* interacting chromatin  
348 modifiers using online tool RPISeq based on random forest (RF) or support vector  
349 machine (SVM) models. Interaction probabilities generated by RPISeq range from 0 to  
350 1, predictions with probabilities > 0.5 indicating that the corresponding RNA and  
351 protein are likely to interact. **(H)** RIP-qPCR analysis of the interaction between  
352 *AC092723.1* and predicted binding chromatin modifiers (n = 3, biological replicates).  
353 **(I)** RT-qPCR analysis of *IRF8* expression in U-937 cells after knockdown of *TET1* by  
354 siRNA (n = 3, biological replicates). **(J)** ChIP-qPCR analysis of the binding efficiency  
355 of TET1 to the *IRF8* promoter with or without *AC092723.1* knockdown (n = 3,  
356 biological replicates). **(K)** Methylation levels of the *IRF8* promoter region in U-937  
357 cells with or without *AC092723.1* knockdown (n = 3, biological replicates). Data are  
358 represented as mean ± SEM and *P*-values are calculated using an unpaired two tailed  
359 Student's t-test. \**P* < 0.05; \*\**P* < 0.01; \*\*\**P* < 0.001.

360

361 **rs2280381 alleles differentially regulate *AC092723.1* and *IRF8* expression by**

362 **modulating PU.1 binding and the chromatin state**

363 eQTL data indicate an association between rs2280381 alleles and *IRF8* and  
364 *AC092723.1* expression levels (Fig. S4A-B), but there is no direct evidence illustrating  
365 that the rs2280381 alleles differentially regulate *IRF8* or *AC092723.1* expression. To  
366 investigate whether rs2280381 alleles directly regulate *AC092723.1* and *IRF8*  
367 expression, we adopted the prime editing technology<sup>51</sup> to generate isogenic cell lines  
368 carrying rs2280381 homozygous major (T/T), homozygous minor (C/C), or  
369 heterozygous (T/C) alleles (Fig. 5A and Fig. S4C). For each genotype, we selected six  
370 clones to measure the effect of rs2280381 on *IRF8* and *AC092723.1* expression. In  
371 agreement with the eQTL data, RT-qPCR data showed that the SLE risk allele (T)  
372 results in lower expression of *AC092723.1* and *IRF8* compared to the non-risk allele  
373 (C) (Fig. 5B-C), consistent with the down-regulated expression of *IRF8* and  
374 *AC092723.1* in SLE patients (Fig. S4D-E).

375 After demonstrating the allele-specific regulation capacity of rs2280381, we next  
376 sought to explore the underlying mechanisms. Genetic variant changes are often  
377 associated with differential enhancer activity, which has been considered as an  
378 important mechanism for SNP allele-specific regulation of gene expression. To test  
379 whether the different rs2280381 alleles can alter chromatin state, we first carried out  
380 H3K4me1 and H3K27ac ChIP experiments followed by allele-specific qPCR in a cell  
381 line that is heterozygous for rs2280381. The resulting data reveal that the C allele of  
382 rs2280381 contains stronger H3K4me1 and H3K27ac histone mark signals than the T  
383 allele (Fig. 5D-E). We also detected the chromatin accessibility of the rs2280381 alleles

384 by FAIRE allele-specific qPCR. In agreement with the allelic bias in histone  
385 modifications, enhancers harboring the C allele exhibit more FAIRE signal than  
386 enhancers harboring the T allele (Fig. 5F), indicating that the C allele has higher  
387 chromatin accessibility than the T allele.

388 Differential transcription factor binding is another feature of SNP-dependent cis-  
389 regulatory effects on gene expression. To determine differential binding of transcription  
390 factors to the rs2280381 sequence, we carried out a DNA-affinity precipitation assay  
391 (DAPA) followed by mass spectrometry (MS) experiment, revealing 100 candidate  
392 proteins. Most proteins identified by DAPA-MS are histone proteins or chromatin  
393 structure maintenance proteins (Supplementary Data Set 3). Given that the rs2280381-  
394 containing region is a monocyte-specific enhancer, we focused on monocyte-specific  
395 transcription factors, identifying PU.1, an important monocyte lineage-determining  
396 transcription factor<sup>52</sup>, as our top candidate. ChIP-qPCR experiments were performed,  
397 with the results verifying PU.1 binding of the rs2280381-containing region (Fig. 5G).  
398 Moreover, siRNA knockdown of PU.1 expression strongly reduced *AC092723.1* and  
399 *IRF8* expression (Fig. 5H-J). In addition, we also detected allelic binding of PU.1 to  
400 rs2280381, with AS-ChIP-qPCR data indicating that the C allele has stronger PU.1  
401 binding than the T allele (Fig. 5K). Taken together, the enhancer with the rs2280381 C  
402 allele has stronger signals for PU.1, H3K4me1, and H3K27ac, and exhibits stronger  
403 chromatin accessibility relative to the T allele, enhancing the expression of *AC092723.1*  
404 and *IRF8*.

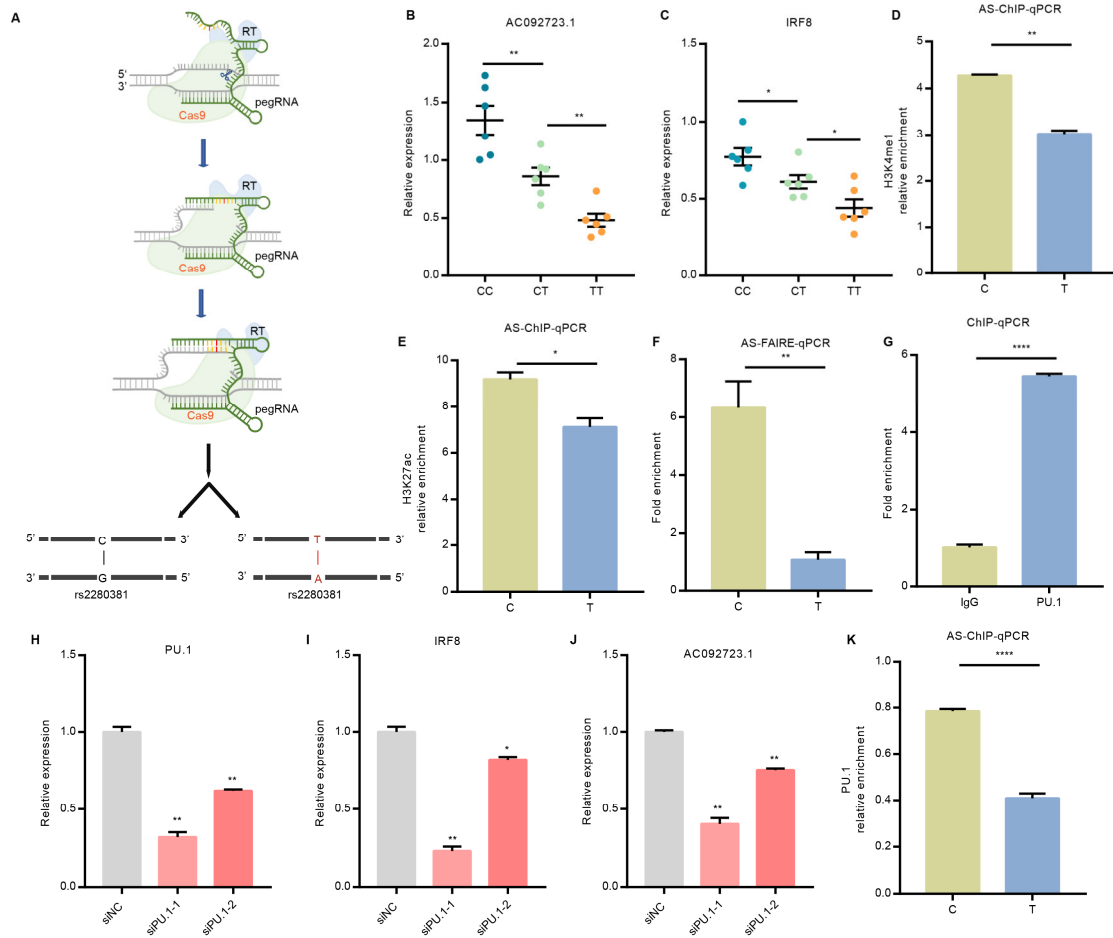

405

406 **Fig. 5 rs2280381 alleles affect H3K4me1, H3K27ac and PU.1 binding to fine tune**

407 **the expression of *AC092723.1* and *IRF8*. (A) Work flow for the generation of isogenic**

408 **cell clones with the Prime editing technology. (B-C) The rs2280381 C allele leads to**

409 **higher expression of *AC092723.1* and *IRF8* compared to the T allele. (n = 6, biological**

410 **samples replicates). (D-E) H3K4me1 and H3K27ac histone marks are stronger for the**

411 **rs2280381 non-risk C allele, as determined by AS-ChIP-qPCR in the rs2280381**

412 **heterozygous U-937 cell clone. (n = 3, biological replicates). (F) The genomic region**

413 **harboring the non-risk allele (C) exhibits increased chromatin accessibility compared**

414 **to the risk allele (T), as determined by AS-FAIRE-qPCR in the rs2280381 heterozygous**

415 **U-937 cell clone. (n = 3, biological replicates). (G) Relative enrichment of PU.1 binding**

416 **to the rs2280381-containing region, as measured by ChIP-qPCR in U-937 cells (n = 3,**



417 biological replicates). **(H-J)** Relative expression of *PU.1* (H), *IRF8* (I) and *AC092723.1*  
418 (J) after PU.1 siRNA-mediated knockdown, as measured by RT-qPCR in U-937 cells  
419 (n = 3, biological replicates). **(K)** PU.1 binds more strongly to the rs2280381 C non-  
420 risk allele, as determined by CHIP followed by AS-qPCR in the rs2280381 heterozygous  
421 U-937 cell clone (n = 3, biological replicates). Data are represented as mean ± SEM  
422 and *P*-values are calculated using an unpaired two tailed Student's *t*-test. \**P* < 0.05;  
423 \*\**P* < 0.01; \*\*\**P* < 0.001.

424

## 425 **Discussion**

426 Transcription factors play a critical role in autoimmune disease development, and  
427 disease-associated genetic variants are useful for revealing critical mechanisms  
428 involved in disease pathogenesis<sup>16,53</sup>. However, only a small number of functional  
429 genetic variants have been identified that alter transcription factor gene expression  
430 levels. To fill this gap, we designed a general strategy for defining the functional  
431 variants regulating *IRF8* expression. Application of this strategy identified rs2280381  
432 as a causal variant in the *IRF8* locus. We also elucidate the specific biological  
433 mechanism underlying rs2280381 mediation of SLE risk: alteration of PU.1 binding,  
434 histone marks, chromatin accessibility, and lncRNA expression, leading to differential  
435 *IRF8* promoter methylation levels and altered *IRF8* expression (Fig. 6).

436 Progress towards discriminating the functional genetic variants regulating  
437 transcription factors is continuously challenged by the existence of linkage  
438 disequilibrium, the specific cell type(s) where the variant functions, and complications

439 inherent to deciphering gene regulatory mechanisms<sup>18</sup>. Through integration of genetic  
440 data with epigenomic analysis, we designed an approach that first ranks all autoimmune  
441 disease-associated SNPs in the *IRF8* locus based on the presence of active enhancer  
442 histone marks, and then identify candidate SNPs with potential regulatory function.  
443 Using CRISPR activation assays, we systematically screened these genetic variants  
444 based on their ability to modulate *IRF8* expression, effectively identifying the  
445 functional regulatory elements harboring disease-associated SNPs. This strategy  
446 provides a blueprint for identifying the functional SNPs regulating the expression of  
447 genes encoding transcription factors or other molecules.

448 Enhancers have been considered effective therapeutic targets for disease  
449 intervention because targeting enhancers might aid in precise treatment, due to the cell-  
450 type specific nature of enhancers<sup>15,54-56</sup>. For instance, editing the erythroid-specific  
451 enhancer of *BCL11A* by CRISPR-Cas9 restores  $\gamma$ -globin synthesis for treating sickle  
452 cell disease<sup>15</sup>. Uncovering disease-critical enhancers would thus provide valuable  
453 therapeutic targets for disease treatment. In this study, using CRISPR-Cas9 mediated  
454 deletion, we edited the rs2280381-containing region in different cell lines and different  
455 immune cell subsets and found that the rs2280381-containing region acts as a distal and  
456 cell-type-specific enhancer to modulate *IRF8* expression, which suggests that the  
457 rs2280381 enhancer has the potential to be a therapeutic target for SLE treatment in the  
458 future. In this manner, deciphering the functional genetic variants associated with  
459 autoimmune disease will aid in the development of novel treatment methods.

460 Gene expression is controlled by a series of regulatory elements, including distal

461 enhancers and the proximal promoter<sup>57,58</sup>. Distal enhancers spatially interact with  
462 promoter regions to regulate target gene expression<sup>59</sup>. We performed 4C-seq assays to  
463 verify promoter-enhancer loops between the *IRF8* promoter and the rs2280381-  
464 containing region, which further supports the regulatory function of the rs2280381-  
465 containing region. Interestingly, we also observed connections between the *IRF8*  
466 promoter site and various other genomic regions (Supplementary Data Set 4), some of  
467 which also contain autoimmune disease-associated genetic variants. Although  
468 regulatory function for these variants has been validated in the CRISPRa screen assays,  
469 the function of these regions remains unknown. Dissecting the function of these  
470 regulatory elements will likely aid in our understanding of the complete picture of *IRF8*  
471 transcriptional regulation.

472 A major challenge inherent to the study of non-coding genetic variants is the  
473 verification of the functional consequences of the different alleles on gene expression.  
474 In this study, we generated cell clones harboring the two rs2280381 alleles by prime  
475 editing and demonstrated allele-specific regulation of rs2280381 on *IRF8* expression.  
476 However, most individual SNPs only have a small effect on gene expression or disease-  
477 associated phenotypes. Some studies have discovered that genetic variants within  
478 multiple enhancers of a gene could synergistically regulate gene expression, thus  
479 amplifying these individually small effects<sup>60</sup>. In our study, in addition to the rs2280381-  
480 containing region, we found several other genetic variant-containing regions, such as  
481 rs8052690, that also could increase *IRF8* expression in the CRISPR activation screen  
482 assay. These data suggest that the combination of functionally independent genetic

483 variants may be an important risk factor for disease. To fully uncover the mechanism  
484 of genetic-mediated disease risk, the synergistic effect of multiple genetic variants  
485 should be emphasized in future studies.

486 Allele-dependent transcription factor binding is a major contributor to allelic gene  
487 expression differences. Using DAPA-MS data and CHIP-qPCR, we found that PU.1 is  
488 the key transcription factor binding to the rs2280381 site, and that PU.1 binds  
489 differentially to the rs2280381 non-risk allele and risk alleles, which likely leads to the  
490 differential regulatory function of the risk and non-risk alleles. The accessibility of  
491 transcription factor binding sites is significantly heterogeneous in human immune cells,  
492 monocytes exhibited high activity of PU.1<sup>61</sup>, and PU.1 is a key lineage-determining TF  
493 for priming monocyte-specific enhancers<sup>52</sup>, the binding of PU.1 to the rs2280381 locus  
494 may contribute to its function as a cell-type-specific enhancer. We also observed  
495 differential chromatin states for the risk and non-risk alleles, which was reflected by  
496 the high H3K27ac enrichment, H3K4me1 enrichment and chromatin accessibility  
497 observed for the non-risk C allele compared to the T risk allele. Collectively, these  
498 observations elucidate the mechanism underlying rs2280381 risk allele-mediated  
499 disease risk. However, whether other proteins involved in this allele specific regulation  
500 and the mechanism forming cell-type-specific enhancer still deserve to be studied in  
501 more depth.

502 Intriguingly, our results indicate that the enhancer RNA *AC092723.1* is involved  
503 in the regulatory mechanisms underlying the differential effect of the rs2280381 alleles  
504 on *IRF8* expression. We show that the rs2280381 alleles are associated with

505 *AC092723.1* expression differences, and *AC092723.1* can directly regulate *IRF8*  
506 expression levels. LncRNA can participate in chromatin remodeling complexes that  
507 modify the chromatin to enhance or suppress gene expression<sup>46,47</sup>. Using a combination  
508 of bioinformatics-based prediction and RIP-qPCR assays, we found that TET1 is a  
509 binding partner of *AC092723.1*. TET1 is a key chromatin modifier that modulates gene  
510 expression by influencing DNA methylation levels<sup>50</sup>. Our ChIRP and ChIP assays  
511 demonstrated that *AC092723.1* recruitment of TET1 results in TET1 binding to the  
512 *IRF8* promoter, reducing DNA methylation levels, and thus modulating *IRF8*  
513 expression. DNA methylation changes contribute to SLE pathogenesis, but the factors  
514 regulating methylation in SLE are largely unknown. Our study links an SLE-associated  
515 genetic variant to DNA methylation and ultimately SLE etiology, adding another layer  
516 of regulation for genetic variant-based modulation of gene expression involved in the  
517 disease.

518 In conclusion, our study provides a blueprint for the establishment of a link  
519 between disease risk genetic risk variants and transcription factor gene expression  
520 levels, and applies this approach to decipher an important mechanism underlying SLE  
521 risk SNP-mediated disease pathogenesis. Our work also provides key insights that form  
522 a strong foundation for the development of disease therapies based on enhancer  
523 modulation.

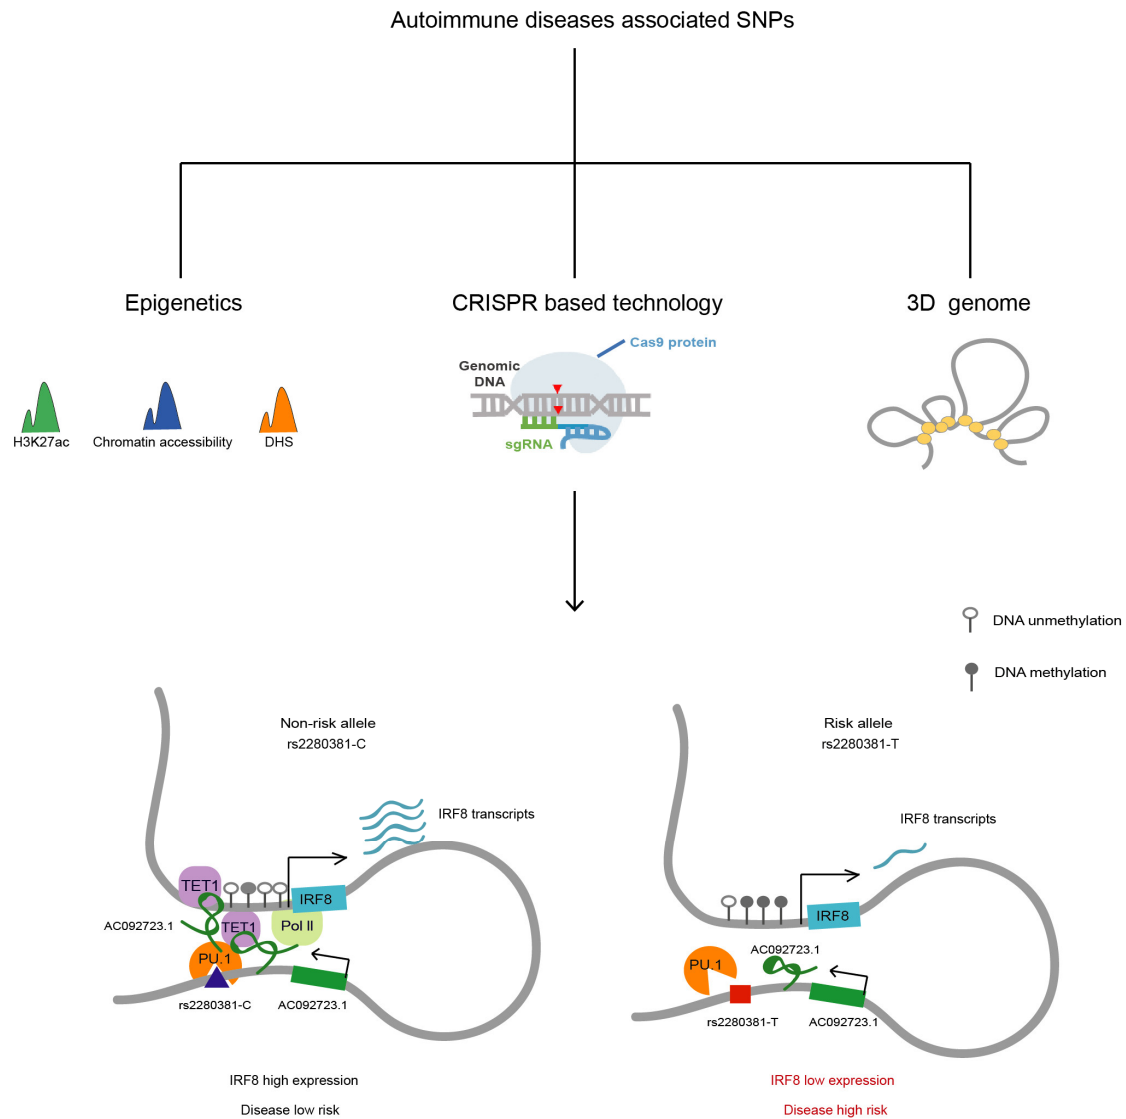

524

525 **Fig. 6. Model for rs2280381 regulated *IRF8* expression mediating disease risk.** The  
 526 rs2280381-containing region forms gene-loop with the *IRF8* promoter region. The  
 527 rs2280381 T risk allele has lower PU.1-binding affinity than the non-risk C allele,  
 528 resulting in the reduction of *AC092723.1* expression, upregulation of methylation levels  
 529 of *IRF8* promoter and decreased *IRF8* expression contributing to SLE risk.

530

## 531 Methods

### 532 Cell culture

533 All cell lines were purchased from the Chinese academy of science cell bank (Shanghai,  
 534 China). U-937, Raji and Jurkat were cultured in 10% (v/v) fetal bovine serum (FBS)  
 535 and 90% RPMI-1640 medium. HEK-293T was cultured with 10% (v/v) FBS and 90%

536 Dulbecco's Modified Eagle Medium (DMEM). Cells were maintained at 37 °C and 5%  
537 CO<sub>2</sub> constant temperature incubator. These cell lines were free of mycoplasma during  
538 our study.

539

#### 540 **RNA extraction and RT-qPCR**

541 Total RNA was extracted from cells using TRIzol Reagent (Invitrogen). Samples of 500  
542 ng of RNA were reverse transcribed using PrimeScript™ RT Reagent Kit (Perfect Real  
543 Time) (TAKARA, RR037A). qPCR was performed using TB Green Premix Ex Taq  
544 reagent (TAKARA, RR420A). GAPDH expression was determined as an internal  
545 control and fold change in expression level was calculated using the  $\Delta\Delta C_t$  method.

546

#### 547 **Western Blotting**

548 Protein lysates were separated on 10% SDS/PAGE gels, transferred to PVDF  
549 membranes and probed with antibodies directed against IRF8 (Cell Signalling  
550 Technology, 5628S, 1:1000 dilution), GAPDH (Abcam, AC035, 1:5000 dilution).  
551 GAPDH was used as a loading control.

552

#### 553 **ASOs and siRNAs transfection**

554 Antisense oligonucleotides (ASOs) and siRNAs were synthesized by Sangon Biotech  
555 (Shanghai, China). Before transfection,  $2 \times 10^5$  cells were seeded into a 24-well plate  
556 and incubated at 37 °C and 5% CO<sub>2</sub> overnight. Next, 200 nM of ASO or siRNA were  
557 transfected into the cells using TransIntro™ EL Transfection Reagent (Transgene,  
558 FT201-01) and cells were collected to extract RNA.

559

#### 560 **RNA Immunoprecipitation (RIP)-qPCR**

561 RIP assays were performed using the EZ-Magna RIP Kit (Millipore).  $1 \times 10^7$  cells were  
562 lysed with RIP lysis buffer. Cell extracts were coimmunoprecipitated with Anti-TET1  
563 antibody (Abcam, ab191698), Anti-KAT3B/p300 antibody (Abcam, ab10485), Anti-  
564 WDR5 antibody (Abcam, ab56919), and Anti-DOT1L Antibody (Thermo, A300-953A).  
565 The recovered RNA was subjected to RT-qPCR analysis and U1 was used as a

566 nonspecific control target.

567

### 568 **Candidate SNP picking**

569 LD expansion was done by the online tool  
570 (<https://pubs.broadinstitute.org/mammals/haploreg/haploreg.php>) to include all SNPs  
571 in strong LD ( $r^2 > 0.8$ ) with the reported tag SNPs at the *IRF8* locus. The chromatin  
572 landscape of SNP-located regions was analyzed using the public resource provided by  
573 the NIH Roadmap Epigenomics Mapping Consortium  
574 (<http://www.roadmapepigenomics.org/>). And SNP-located regions with any signal of  
575 ATAC-seq peaks, H3K27Ac peaks or DNase peaks in four major human immune cell  
576 subsets were selected as candidate SNPs to undergo CRISPRa screening assays.

577

### 578 **Cell fractionation**

579 This assay was performed using the Nuclear and Cytoplasmic Extraction Kit (CW BIO,  
580 Shanghai). In brief,  $1 \times 10^7$  cells were harvested and resuspended in 1 mL of Nc-buffer  
581 A and 55  $\mu$ L of Nc-buffer B and incubated on ice for 10 min. Cells were then centrifuged  
582 for 15 min at  $12,000 \times g$  and the supernatant was collected as the cytoplasmic fraction.  
583 The pellets were resuspended for 40 min on ice in 500  $\mu$ L of Nc-buffer C supplemented  
584 with RNase inhibitors, centrifuged for 15 min at  $12,000 \times g$  and the supernatant was  
585 collected as the nuclear fraction. All fractions were resuspended in TRIzol to extract  
586 RNA.

587

### 588 **Chromatin Immunoprecipitation (ChIP)-qPCR**

589 This assay was performed using the SimpleChIP® Plus Enzymatic Chromatin IP Kit  
590 (Cell Signaling Technology). Briefly,  $5 \times 10^6$  cells were first cross-linked by 1%  
591 formaldehyde solution and then quenched by 125 mM glycine solution. After that, cells  
592 were washed by cold PBS for twice. Cell pellets were resuspended with 1 mL cold  $1 \times$   
593 Buffer A, incubated on ice for 10 min and centrifuged to remove supernatant. Then the  
594 pellets were resuspended in 1 mL cold  $1 \times$  Buffer B, centrifuged to remove supernatant  
595 and resuspended in 100  $\mu$ L  $1 \times$  Buffer B. 0.5  $\mu$ L of Micrococcal Nuclease was added and



596 incubated at 37 °C for 20 min to digest DNA into 150-900 bp length. 10 µL of 0.5 M  
597 EDTA was added to stop the digestion, then samples were centrifuged to discard the  
598 supernatant. Finally, pellets were resuspended with 100 µL of 1×ChIP Buffer, incubated  
599 on ice for 10 min and subsequently sonicated at 4 °C with a Bioruptor sonicator  
600 (Diagenode) at high power for 5 cycles with 30 s ON and 30 s OFF. This was  
601 centrifuged and supernatant was collected into a new tube and incubated with anti-  
602 H3K27 antibody (ab177178, Abcam, 2 µg for 25 µg of chromatin) or anti-H3K4me1  
603 antibody (ab8895, Abcam, 2 µg for 25 µg of chromatin) or anti-PU.1 antibody (2266S,  
604 Cell Signaling Technology, 1:50) overnight at 4 °C on rotation. ChIP-grade protein  
605 A+G magnetic beads (Millipore, 16-663) were added and the enriched chromatin was  
606 eluted with 150 uL ChIP Elution Buffer. DNA fragments were purified with spin  
607 columns and enrichment was detected by qPCR.

608

#### 609 **Formaldehyde-Assisted Isolation of Regulatory Elements (FAIRE)-qPCR**

610  $1 \times 10^7$  cells were cross-linked by 1% formaldehyde solution and then quenched by 125  
611 mM glycine solution. Cells were then sonicated, equal volume of  
612 phenol/chloroform/isoamyl alcohol was added into the chromatin lysate and  
613 centrifuged to isolate the aqueous. The aqueous was further purified by adding  
614 chloroform/isoamyl alcohol. Then DNA was precipitated, washed and reverse  
615 crosslinked to prepare the FAIRE DNA. FAIRE DNA samples were analyzed by  
616 quantitative RT-PCR with specific primers targeting DNA sequences at different  
617 distances to rs2280381 site. Values were normalized to input DNA and compared to a  
618 region just outside the putative regulatory region.

619

#### 620 **Allele-specific qPCR**

621 We designed AS-qPCR primers to specifically amplify the rs2280381 region with a T  
622 or C allele in the ChIP or FAIRE DNA samples. AS-qPCR was performed according to  
623 normal qPCR procedures.

624

#### 625 **RNA library preparation, sequencing and gene expression analysis**

626 Total RNA was extracted using TRIzol Reagent. rRNA was depleted from total RNA  
627 using Ribo-Zero™ rRNA removal Kit and library was made using Illumina NEBNext®  
628 Ultra™ Directional RNA Library Prep Kit (E7420L, NEB). The libraries were loaded  
629 on an Illumina HiSeq X ten instrument (Illumina). Sequencing was carried out using a  
630 2×150 paired-end configuration. Computational analysis of paired-end reads was  
631 conducted using cutadapt (v1.15), Samtools (v0.1.19), Hisat2 (v2.1.0), and HT-seq  
632 (v0.11.2) software. Statistical normalization and differential analysis were performed  
633 in R using the DESeq2 (v1.24.0) package. The threshold to define up or down  
634 regulation was log<sub>2</sub> fold-change > 1.2 and P value < 0.05. Visualization was also  
635 conducted in R (v3.3.3).

636

### 637 **Chromatin isolation by RNA purification (ChIRP)-qPCR**

638 Probes were designed using an online tool (singlemoleculefish.com). Oligonucleotides  
639 were synthesized and biotinylated at the 3' end. 2×10<sup>7</sup> cells were first cross-linked in  
640 1% glutaraldehyde solution at room temperature, then quenched by 1/10 volume of 1.25  
641 M glycine. Pellets were washed by cold 1×PBS, resuspended in ChIRP lysis buffer and  
642 sonicated into 100-500 bp length. 20 μL of lysate was removed to prepare input RNA  
643 and DNA sample, then 2 mL hybridization buffer and total 100 pmol probes were added  
644 to the remaining lysate and incubated at 37 °C with gentle shaking for 4 hours. 100 μL  
645 Dynabeads™ MyOne™ Streptavidin C1 (Invitrogen, 65001) were added into each tube,  
646 incubated at 37 °C with gentle shaking for 0.5 hour to isolate the chromatin. Chromatin  
647 samples for isolating RNA were treated with proteinase K, boiled at 95 °C, then quickly  
648 chilled on ice and RNA was extracted using 1 mL TRIzol. RNA samples were then  
649 reverse transcribed into cDNA. *AC092723.1* and *GAPDH* enrichment was detected by  
650 RT-qPCR, respectively. Chromatin samples for isolating DNA were treated with  
651 RNaseA and proteinase K, and purified with phenol/chloroform/isoamyl. DNA samples  
652 were directly utilized as a template to detect the enriched region.

653

### 654 **Genome editing in cell lines**

655 For Prime editing, pegRNA was designed using the online CRISPR tool

656 (<http://pegfinder.sidichenlab.org/>). For constructing nicking gRNA expression vector,  
657 pKLV-U6gRNA(BbsI)-PGKpuro2ABFP(Addgene, 50946) was linearized by BbsI  
658 (NEB, R3059L) and then gel-purified. Guide RNA oligos were synthesized in Tsingke  
659 (Shanghai, China), annealed and subcloned into the linearized 50946 plasmid and were  
660 transformed into chemically competent Escherichia coli (Stbl3, Transgen Biotech) to  
661 extract plasmid DNA. For constructing pegRNA expression vector, 50946 plasmid was  
662 cut by BbsI (NEB, R3059L) and BamHI (NEB, R0136S) and then gel-purified. Guide  
663 RNA oligos, gRNA scaffold oligoes, RT temple and prime binding sequence oligoes  
664 were annealed and subcloned into the BbsI and BamHI cut plasmid. For editing,  $2 \times 10^6$   
665 U-937 cells were prepared and washed by PBS for electro-transfection, 10  $\mu$ g pCMV-  
666 PE2-P2A-GFP (Addgene, 132776) plasmid, 10  $\mu$ g plasmid expressing pegRNA and 5  
667  $\mu$ g plasmid expressing nicking gRNA were added to cells and resuspend with 100  $\mu$ L  
668 buffer R, then cells were transfected with the condition of 1400 v, 10 ms, 3 pulses using  
669 Neon system. Cells were immediately plated to 6-well plate and cultured for 72 hours.  
670 Single cell with strong GFP and BFP signals was sorted into the 96-well plate  
671 containing 200  $\mu$ L culture medium in each well by FACS. After 14 days culture, clones  
672 were transferred to a 24-well plate and genotype was identified by sanger sequencing.

673

674 To delete the genome sequence around rs2280381, we utilized a dual-guide RNA  
675 strategy using two Cas9-guide RNA constructs. gRNAs were designed using an online  
676 tool (<https://chopchop.cbu.uib.no/#>), 1 pair of gRNAs around rs2280381 with the  
677 highest editing efficiency and a relatively lower off-target rate was chosen. gRNA  
678 oligoes were annealed and subcloned into the BbsI linearized px458 vector  
679 (Addgene,48138).  $2 \times 10^6$  cells were transfected with 5  $\mu$ g px458-gRNA1 and 5  $\mu$ g  
680 px458-gRNA2 plasmids using Neon system. Single cells with strong GFP signal were  
681 sorted into a 96-well plate by FACS. After 14 days of culture, genomic deletions were  
682 screened with Sanger sequencing of PCR amplicons. Electroporation conditions for  
683 each cell line were as follows: U-937, 1400 v, 10 ms, 3 pulses; Raji, 1350 v, 30 ms, 1  
684 pulse; Jurkat, 1350 v, 10 ms, 3 pulses.

685

## 686 **CRISPRa screening**

687 To design CRISPRa gRNAs, we first downloaded candidate SNP-centered 200 bp  
688 length sequences from human genome build GRCh38/hg19  
689 (<https://genome.ucsc.edu/cgi-bin/hgGateway>) and utilized the CHOPCHOP online  
690 gRNA design tool (<https://chopchop.cbu.uib.no/#>) to obtain gRNA according to higher  
691 efficiency and lower off-target rate. For each candidate SNP, 3 gRNAs were designed  
692 around the SNPs and synthesized by GenScript Inc. The gRNA was dissolved to 35  $\mu$ M  
693 concentration and stored at -20 °C. Prior to delivering gRNA into cells, U-937 cells  
694 stably expressing dCas9-*vp64*-Blast (Addgene 61425) and MS2-P65-HSF1-Hygro  
695 (Addgene 61426) were established by transduction of corresponding lentivirus  
696 following selection with 10  $\mu$ g/mL Blasticidin (Invivogene, ant-bl-5) and 300  $\mu$ g/mL  
697 Hygromycin (Thermo Fisher, 10687010) for one week. For screening,  $2 \times 10^5$  U-937 cells  
698 were resuspended in Buffer R, and 0.5  $\mu$ L of each gRNA targeting the corresponding  
699 SNP were added into the cells. Then, the gRNA-Cells-buffer R mixture was aspirated  
700 into the 10  $\mu$ L Neon pipette tip, and transfected using the Neon transfection system with  
701 the condition 1400 V, 10 ms, 3 pulses. After transfection, the cells were immediately  
702 transferred into a 24-well plate containing pre-warmed 10% FBS+90% RPMI-1640  
703 media. After 24 hours culture, cells were collected to extract RNA.

704

## 705 **CRISPR SAM assay in the U-937 cell line**

706 sgRNAs targeting the rs2280381-containing region were synthesized, annealed and  
707 cloned into lenti-sgRNA(MS2)-zeo backbone plasmid (Addgene, 61427) using  
708 restriction enzyme BsmBI (NEB, R0580L). sgRNA lentivirus particles were produced  
709 and transduced into a U-937 cell line stably expressing dCas9-VP64 and MS2-P65-  
710 HSF1 fusion proteins. Cells were selected with 400  $\mu$ g/mL Zeocin (R25001, Thermo  
711 Fisher) for 72 h.

712

## 713 **PBMC isolation**

714 Healthy human donors were recruited and signed informed consent according to the  
715 internal review and ethics boards of Renji Hospital, Shanghai Jiao Tong University.

716 PBMCs were isolated using Ficoll-Paque density gradient solution (density =1.077  
717 g/ml; GE Healthcare). Peripheral blood was mixed in a 1:2 ratio with phosphate-  
718 buffered saline (PBS) containing 2% FBS and 2 mM EDTA. After density gradient  
719 centrifugation ( $400 \times g$ , 35 min, no brakes), the PBMC layer was carefully removed  
720 and the cell pellets were washed twice with PBS for further study.

721

### 722 **Lentivirus production**

723  $3 \times 10^5$  HEK-293T cells were seeded into a six-well plate and incubated at 37 °C and 5%  
724 CO<sub>2</sub> for overnight. Then cells were transfected with 1mg of targeting plasmid, 250 ng  
725 of pMD2.G (Addgene, 12259), and 750 ng of psPAX2 (Addgene, 12260) using 3 µL of  
726 Lipofectamine 2000 (Thermo Fisher, 11668-019). The media was changed after  
727 transfection for 6 hours. After transfection for 72 hours, virus supernatant was collected  
728 and centrifuged at 4 °C for 10 min to remove the debris. The supernatant was aliquoted,  
729 and stored at -80 °C.

730

### 731 **Circular chromatin conformation capture assay (4C) sequencing**

732 To perform 4C-seq experiments,  $1 \times 10^7$  cells were collected and cross-linked by 1%  
733 formaldehyde solution. Then cells were quenched by 125 mM glycine solution. Cell  
734 pellets were resuspended in 5 mL cold lysis buffer (50 mM Tris, 150 mM NaCl, 5 mM  
735 EDTA, 0.5% NP-40, 1% Triton X-100, 1× protease inhibitor) and incubated on ice for  
736 10 min. After lysis, cell nuclei pellets were collected, washed and resuspended in 500  
737 µL 1× Csp6I buffer. 15 µL 10% SDS was added and incubated for 1 hour in a shaker at  
738 750 r.p.m, then 75 µl 20% Triton X-100 was added and incubated for another 1 h with  
739 gentle shaking to sequester the SDS. 200 units of Csp6I enzyme (ThermoFisher,  
740 FD0214) (for rs2280381 view point, Csp6I was replaced with MboI (NEB, R0147M))  
741 were added for a 4 h incubation at 37 °C in a shaker at 900 r.p.m. Then, 200 units of  
742 Csp6I enzyme was re-added and incubated at 37 °C in a shaker at 900 r.p.m overnight.  
743 Enzyme was inactivated at 65 °C for 20 min, 700 µL 10×T4 DNA ligase buffer was  
744 added and supplemented with Milli-Q ddH<sub>2</sub>O to a total volume of 7 mL. Then, 100  
745 Units of T4 DNA ligase was added and incubated at room temperature for 6 hours. After

746 that, 30  $\mu$ L of Proteinase K (10mg/ml) was added and incubated at 65  $^{\circ}$ C for overnight.  
747 The remaining RNA was cleared by adding 30  $\mu$ L RNase A (10mg/ml) and incubating  
748 at 37  $^{\circ}$ C for 45min. DNA was extracted with equivalent phenol/chloroform/isoamyl,  
749 and the pellets were dissolved in 150  $\mu$ L 10mM Tris-HCl (pH 7.5). 50  $\mu$ L of 10  $\times$ NlaIII  
750 buffer and 50 units of NlaIII enzyme were added and supplemented with Milli-Q ddH<sub>2</sub>O  
751 to 500  $\mu$ L volume. Samples were incubated at 37  $^{\circ}$ C for overnight. Enzyme was  
752 inactivated at 65  $^{\circ}$ C for 20 min, add 1.4 mL 10  $\times$  T4 DNA ligation buffer, 100 Units of  
753 T4 DNA ligase, supplement Milli-Q ddH<sub>2</sub>O to 14 mL and ligate at room temperature  
754 for 4 h. DNA was purified using phenol–chloroform and further purified with the  
755 QIAquick PCR purification kit (Qiagen, 28106). The DNA concentration was detected  
756 by Qubit (ThermoFisher). The 4C-seq library was constructed by amplification of  
757 template using the 2 $\times$ High-Fidelity Master Mix kit (Tsingke, TP001) with locus-  
758 specific primers containing Illumina sequences. The libraries were purified and  
759 sequenced on a HiSeq  $\times$  ten (Illumina). 4C-seq data were analyzed using the software  
760 pipeline 4Cseqpipe (version 0.7), with settings: -stat\_type median, trend\_resolution  
761 2000. Normalized trend was computed within the genomic region (chr16: 85,860,001–  
762 86,060,000) for both viewpoints. Bowtiealign (version 1.2) was used to map captured  
763 reads to the Homo sapiens genome assembly GRCh37 (hg19) with the settings: -m 1  
764 and captured fragments on chromosome 5 (reads per million more than 20) were listed.

765

#### 766 **Cas9 RNP assembly**

767 Alt-R crRNAs and Alt-tracrRNA-ATTO550 (IDT, 1075928) were ordered from  
768 Integrated DNA Technologies (IDT) and dissolved with Nuclease-Free Duplex Buffer  
769 (IDT) to 200  $\mu$ M concentration. Equimolar concentrations of two oligos were mixed to  
770 a final 44  $\mu$ M concentration and annealed. For each reaction, 22 pmol of crRNA-  
771 tracrRNA duplex and 18 pmol of HiFi Cas9 protein (1081061, IDT) were mixed in  
772 Buffer T to a final volume 1 $\mu$ L and incubated at room temperature for 10 min to prepare  
773 the Cas9 RNP.

774

#### 775 **Primary immune cell subset isolation and editing**

776 CD3<sup>+</sup> T cells, CD14<sup>+</sup> monocytes and CD19<sup>+</sup> B cells were isolated from human  
777 PBMCs using the Human CD3<sup>+</sup> T Cell Isolation kit (Miltenyi Biotec,130-050-101),  
778 Human CD14<sup>+</sup> monocytes Isolation kit (Miltenyi Biotec, 130-050-201) and Human  
779 CD19<sup>+</sup> B Cell Isolation kit (Miltenyi Biotec,130-050-301) respectively.

780

781 For T cell editing, after isolation, T cells were cultured in OpTmizer™ CTS™ T-Cell  
782 Expansion SFM medium (Thermo Fisher, A10458-03) supplemented with CD3/CD28  
783 dynabeads (Thermo Fisher, 11131D) for 48 hours. Before transfection, CD3/CD28  
784 dynabeads were removed and T cells were cultured for another 6 hours. Then  $2 \times 10^5$   
785 cells were washed twice with PBS and resuspended into 9  $\mu$ L of Buffer T, mixed with  
786 Cas9 RNP and electroporated using the Neon transfection system with the condition  
787 1400 V, 10 ms, 3 pulses. After that, T cells were transferred to the culture medium  
788 supplemented with 30 IU/mL IL-2 (Peprotech, 200-02A). After electroporation for 3  
789 days, cells were collected to extract RNA and DNA.

790

791 For B cell editing, after isolation, B cells were cultured in RPMI-1640 medium with  
792 10% (vol/vol) HI-FBS, 2 mM L-Glutamine, 55  $\mu$ M  $\beta$ -mercaptoethanol, 50 IU/mL  
793 interleukin 4 (Peprotech, 200-04) and supplemented with CD40 ligand (Miltenyi Biotec,  
794 130-098-775) for 48 hours.  $1.2 \times 10^5$  cells were collected and washed twice with PBS  
795 and resuspended into 9  $\mu$ L of Buffer T, mixed with Cas9 RNP and electroporated using  
796 the Neon transfection system with the condition 1400 V, 10 ms, 3 pulses. After  
797 transfection, cells were immediately transferred to 500  $\mu$ L of culture medium and  
798 cultured for 3 days, then cells were collected to extract RNA and DNA.

799

800 For monocyte editing,  $2.5 \times 10^5$  monocytes were washed twice with PBS and  
801 resuspended into 9  $\mu$ l of Buffer T, mixed with Cas9 RNP, 1  $\mu$ L Alt-R Cas9  
802 Electroporation Enhancer and electroporated using the Neon transfection system with  
803 the condition 1600 V, 10 ms, 3 pulses. Cells were immediately transferred to 200  $\mu$ L of  
804 medium containing 90% RPMI-1640 medium, 10% (vol/vol) HI-FBS, 2 mM L-  
805 Glutamine and 55  $\mu$ M  $\beta$ -mercaptoethanol. After electroporation for 24 hours, cells with



806 strong ATTO550 signal were collected to extract RNA and DNA.

807

### 808 **DNA methylation analysis**

809 DNA was extracted from cells using the QIAamp DNA Mini Kit (Qiagen, DP304)  
810 and quantified using NanoDrop. Then DNA was treated with sodium bisulfite by using  
811 the EZ DNA Methylation-Gold Kit (Zymo, D5006) according to the manufacturer's  
812 recommendations. Promoter methylation of *IRF8* was determined using quantitative  
813 methylation-specific polymerase chain reaction.

### 814 **DNA affinity precipitation assay (DAPA)-mass spectrometry**

815 Cells were lysed to extract the nuclear lysates, and 200 µg nuclear extracts were mixed  
816 with 50 pmol of 5'-biotinylated DNA probes in the Buffer (20 mM HEPES, pH 7.9, 10%  
817 glycerol, 50 mM KCl, 0.2mM EDTA, 1.5 mM MgCl<sub>2</sub>, 100 µg/mL Sheared Salmon  
818 sperm DNA, 1 mM dithiothreitol, and 0.25% Triton X-100) and incubated on ice for  
819 45 min. Then Dynabeads™ M-280 Streptavidin (11205D, Thermo Fisher) was added  
820 and rotated for 2 hours at 4 °C. The enriched proteins were dissociated by the addition  
821 of 2 x Laemmli sample buffer (161-0737, Bio-Rad) and boiled at 95 °C for 10 min. The  
822 boiled protein samples were digested by trypsin for MS analysis.

### 823 **Liquid chromatography-MS/MS analysis and data processing**

824 The tryptic peptides were dissolved in 0.1% formic acid (solvent A), and directly loaded  
825 onto a home-made reversed-phase analytical column (15 cm length, 75 µm i.d.). The  
826 gradient comprised an increase from 6% to 23% solvent B (0.1% formic acid in 98%  
827 acetonitrile) over 16 min, 23% to 35% in 8 min and climbing to 80% in 3 min then  
828 holding at 80% for the last 3 min, all at a constant flow rate of 400 nl/min on an EASY-  
829 nLC 1000 UPLC system.

830

831 The peptides were subjected to NSI source followed by tandem MS (MS/MS) in Q  
832 Exactive™ Plus (Thermo) coupled online to the UPLC. The electrospray voltage  
833 applied was 2.0 kV. The m/z scan range was 350–1800 for full scan and intact peptides



834 were detected in the Orbitrap at a resolution of 70,000. Peptides were then selected for  
835 MS/MS using NCE setting as 28 and the fragments were detected in the Orbitrap at a  
836 resolution of 17,500. A data-dependent procedure was used that alternated between one  
837 MS scan followed by 20 MS/MS scans with 15.0 s dynamic exclusion. Automatic gain  
838 control was set at 5E4.

839

840 The resulting MS/MS data were processed using Mascot Daemon (version 2.3.0).  
841 Tandem mass spectra were searched against 2019-uniprot-human database. Trypsin/P  
842 was specified as cleavage enzyme allowing up to two missing cleavages. Mass error  
843 was set to 10 p.p.m. for precursor ions and 0.02 Da for fragment ions. Carbamidomethyl  
844 on Cys were specified as fixed modification and oxidation on Met was specified as  
845 variable modification. Peptide confidence was set at high and peptide ion score was  
846 set >20.

847

848 All oligoes used in this paper are listed in Supplementary Tables in Supplementary  
849 Information.

850

### 851 **Statistical analysis**

852 All statistical analyses were performed using R Studio (version 1.0.136) with R version  
853 3.3.3 and GraphPad Prism 7 software. Data are shown as mean  $\pm$  SEM. “n” represents  
854 the number of technical replicates of the representative biological replicate unless  
855 otherwise mentioned. Details of the statistical analysis for each experiment can be  
856 found in the relevant figure legends. All statistical analyses were calculated using a  
857 paired or unpaired two-tailed Student’s t test as indicated in the figure legend unless  
858 otherwise mentioned. Asterisks define the significance level (\*  $P \leq 0.05$ ; \*\*  $P \leq 0.01$ ;  
859 \*\*\*  $P \leq 0.001$ ).

860

### 861 **Data availability**

862 The RNA sequencing data and 4C sequencing data that support the findings of this  
863 study have been deposited in the ArrayExpress database under accession codes [E-](#)

864 [MTAB-10126](#) and [E-MTAB-10120](#) respectively. The public ATAC sequencing data [E-](#)  
865 [MTAB-8982](#) was used to analyze the chromatin accessibility. All other remaining data  
866 are available within the Article and Supplementary Files or are available from the  
867 authors upon request.

868

## 869 **References**

- 870 1. Lambert, S.A. *et al.* The Human Transcription Factors. *Cell* **172**, 650-665 (2018).
- 871 2. Whyte, W.A. *et al.* Master transcription factors and mediator establish super-enhancers at  
872 key cell identity genes. *Cell* **153**, 307-19 (2013).
- 873 3. Lee, T.I. & Young, R.A. Transcriptional regulation and its misregulation in disease. *Cell* **152**,  
874 1237-51 (2013).
- 875 4. Rubtsova, K. *et al.* B cells expressing the transcription factor T-bet drive lupus-like  
876 autoimmunity. *J Clin Invest* **127**, 1392-1404 (2017).
- 877 5. Kim, C.J. *et al.* The Transcription Factor Ets1 Suppresses T Follicular Helper Type 2 Cell  
878 Differentiation to Halt the Onset of Systemic Lupus Erythematosus. *Immunity* **49**, 1034-  
879 1048.e8 (2018).
- 880 6. Savitsky, D.A., Yanai, H., Tamura, T., Taniguchi, T. & Honda, K. Contribution of IRF5 in B  
881 cells to the development of murine SLE-like disease through its transcriptional control of  
882 the IgG2a locus. *Proc Natl Acad Sci U S A* **107**, 10154-9 (2010).
- 883 7. Song, S. *et al.* Inhibition of IRF5 hyperactivation protects from lupus onset and severity. *J*  
884 *Clin Invest* **130**, 6700-6717 (2020).
- 885 8. Bushweller, J.H. Targeting transcription factors in cancer - from undruggable to reality.  
886 *Nat Rev Cancer* **19**, 611-624 (2019).
- 887 9. Chen, A. & Koehler, A.N. Transcription Factor Inhibition: Lessons Learned and Emerging  
888 Targets. *Trends Mol Med* **26**, 508-518 (2020).
- 889 10. Oleksiak, M.F., Churchill, G.A. & Crawford, D.L. Variation in gene expression within and  
890 among natural populations. *Nat Genet* **32**, 261-6 (2002).
- 891 11. The GTEx Consortium atlas of genetic regulatory effects across human tissues. *Science*  
892 **369**, 1318-1330 (2020).
- 893 12. Mohammadi, P., Castel, S.E., Brown, A.A. & Lappalainen, T. Quantifying the regulatory  
894 effect size of cis-acting genetic variation using allelic fold change. *Genome Res* **27**, 1872-  
895 1884 (2017).
- 896 13. Hagberg, N. *et al.* The STAT4 SLE risk allele rs7574865[T] is associated with increased IL-  
897 12-induced IFN- $\gamma$  production in T cells from patients with SLE. *Ann Rheum Dis* **77**, 1070-  
898 1077 (2018).
- 899 14. Liu, N. *et al.* Direct Promoter Repression by BCL11A Controls the Fetal to Adult  
900 Hemoglobin Switch. *Cell* **173**, 430-442.e17 (2018).
- 901 15. Frangoul, H. *et al.* CRISPR-Cas9 Gene Editing for Sickle Cell Disease and  $\beta$ -Thalassemia.  
902 *N Engl J Med* **384**, 252-260 (2021).

- 903 16. Sankaran, V.G. *et al.* Human Fetal Hemoglobin Expression Is Regulated by the  
904 Developmental Stage-Specific Repressor BCL11A. *Science* **322**, 1839-1842 (2008).
- 905 17. Karagianni, P. & Tzioufas, A.G. Epigenetic perspectives on systemic autoimmune disease.  
906 *J Autoimmun* **104**, 102315 (2019).
- 907 18. Farh, K.K.-H. *et al.* Genetic and epigenetic fine mapping of causal autoimmune disease  
908 variants. *Nature* **518**, 337-343 (2015).
- 909 19. Yin, X. *et al.* Meta-analysis of 208370 East Asians identifies 113 susceptibility loci for  
910 systemic lupus erythematosus. *Ann Rheum Dis* (2020).
- 911 20. Wang, Y.F. *et al.* Identification of 38 novel loci for systemic lupus erythematosus and  
912 genetic heterogeneity between ancestral groups. *Nat Commun* **12**, 772 (2021).
- 913 21. O'Shea, J.J. & Plenge, R. JAK and STAT signaling molecules in immunoregulation and  
914 immune-mediated disease. *Immunity* **36**, 542-50 (2012).
- 915 22. Sun, S.C. The non-canonical NF- $\kappa$ B pathway in immunity and inflammation. *Nat Rev*  
916 *Immunol* **17**, 545-558 (2017).
- 917 23. van der Wijst, M.G.P. *et al.* Single-cell RNA sequencing identifies celltype-specific cis-  
918 eQTLs and co-expression QTLs. *Nat Genet* **50**, 493-497 (2018).
- 919 24. Schmiedel, B.J. *et al.* Impact of Genetic Polymorphisms on Human Immune Cell Gene  
920 Expression. *Cell* **175**, 1701-1715.e16 (2018).
- 921 25. Gupta, R.M. *et al.* A Genetic Variant Associated with Five Vascular Diseases Is a Distal  
922 Regulator of Endothelin-1 Gene Expression. *Cell* **170**, 522-533.e15 (2017).
- 923 26. Alasoo, K. *et al.* Shared genetic effects on chromatin and gene expression indicate a role  
924 for enhancer priming in immune response. *Nat Genet* **50**, 424-431 (2018).
- 925 27. De Jager, P.L. *et al.* Meta-analysis of genome scans and replication identify CD6, IRF8 and  
926 TNFRSF1A as new multiple sclerosis susceptibility loci. *Nature genetics* **41**, 776-782 (2009).
- 927 28. Cunninghame Graham, D.S. *et al.* Association of NCF2, IKZF1, IRF8, IFIH1, and TYK2 with  
928 systemic lupus erythematosus. *PLoS Genet* **7**, e1002341 (2011).
- 929 29. Lessard, Christopher J. *et al.* Identification of IRF8, TMEM39A, and IKZF3-ZBP2 as  
930 Susceptibility Loci for Systemic Lupus Erythematosus in a Large-Scale Multiracial  
931 Replication Study. *Am J Hum Genet* **90**, 648-660 (2012).
- 932 30. Chrobot, B.S. *et al.* Genetic variation near IRF8 is associated with serologic and cytokine  
933 profiles in systemic lupus erythematosus and multiple sclerosis. *Genes Immun* **14**, 471-8  
934 (2013).
- 935 31. Li, S.W., He, Y., Zheng, Z.H., Liu, D.W. & Liu, Z.S. Single-nucleotide polymorphisms of IRF8  
936 gene are associated with systemic lupus erythematosus in Chinese Han population. *Int J*  
937 *Immunogenet* **41**, 112-8 (2014).
- 938 32. Sheng, Y.J. *et al.* Association analyses confirm five susceptibility loci for systemic lupus  
939 erythematosus in the Han Chinese population. *Arthritis Res Ther* **17**, 85 (2015).
- 940 33. Matana, A. *et al.* Genome-Wide Analysis Identifies Two Susceptibility Loci for Positive  
941 Thyroid Peroxidase and Thyroglobulin Antibodies. *J Clin Endocrinol Metab* **105**(2020).
- 942 34. Takeuchi, M. *et al.* Dense genotyping of immune-related loci implicates host responses  
943 to microbial exposure in Behçet's disease susceptibility. *Nat Genet* **49**, 438-443 (2017).
- 944 35. Salem, S., Salem, D. & Gros, P. Role of IRF8 in immune cells functions, protection against  
945 infections, and susceptibility to inflammatory diseases. *Hum Genet* **139**, 707-721 (2020).
- 946 36. White, C.L., Kessler, P.M., Dickerman, B.K., Ozato, K. & Sen, G.C. Interferon Regulatory

- 947 Factor 8 (IRF8) Impairs Induction of Interferon Induced with Tetratricopeptide Repeat  
948 Motif (IFIT) Gene Family Members. *J Biol Chem* **291**, 13535-45 (2016).
- 949 37. Sjöstrand, M. *et al.* Expression of the immune regulator tripartite-motif 21 is controlled by  
950 IFN regulatory factors. *J Immunol* **191**, 3753-63 (2013).
- 951 38. Eyre, S. *et al.* High-density genetic mapping identifies new susceptibility loci for  
952 rheumatoid arthritis. *Nat Genet* **44**, 1336-40 (2012).
- 953 39. Ha, E., Bae, S.C. & Kim, K. Large-scale meta-analysis across East Asian and European  
954 populations updated genetic architecture and variant-driven biology of rheumatoid  
955 arthritis, identifying 11 novel susceptibility loci. *Ann Rheum Dis* (2020).
- 956 40. Gorlova, O. *et al.* Identification of novel genetic markers associated with clinical  
957 phenotypes of systemic sclerosis through a genome-wide association strategy. *PLoS*  
958 *Genet* **7**, e1002178 (2011).
- 959 41. López-Isac, E. *et al.* GWAS for systemic sclerosis identifies multiple risk loci and highlights  
960 fibrotic and vasculopathy pathways. *Nat Commun* **10**, 4955 (2019).
- 961 42. Bentham, J. *et al.* Genetic association analyses implicate aberrant regulation of innate and  
962 adaptive immunity genes in the pathogenesis of systemic lupus erythematosus. *Nat Genet*  
963 **47**, 1457-64 (2015).
- 964 43. Bashinskaya, V.V. *et al.* GWAS-identified multiple sclerosis risk loci involved in immune  
965 response: validation in Russians. *J Neuroimmunol* **282**, 85-91 (2015).
- 966 44. Beecham, A.H. *et al.* Analysis of immune-related loci identifies 48 new susceptibility  
967 variants for multiple sclerosis. *Nat Genet* **45**, 1353-60 (2013).
- 968 45. Chu, C., Quinn, J. & Chang, H.Y. Chromatin isolation by RNA purification (ChIRP). *Journal*  
969 *of visualized experiments : JoVE*, 3912 (2012).
- 970 46. Tsai, M.C. *et al.* Long noncoding RNA as modular scaffold of histone modification  
971 complexes. *Science* **329**, 689-93 (2010).
- 972 47. Yu, B. *et al.* B cell-specific XIST complex enforces X-inactivation and restrains atypical B  
973 cells. *Cell* **184**, 1790-1803.e17 (2021).
- 974 48. Muppirala, U.K., Honavar, V.G. & Dobbs, D. Predicting RNA-protein interactions using only  
975 sequence information. *BMC Bioinformatics* **12**, 489 (2011).
- 976 49. Muppirala, U.K., Lewis, B.A. & Dobbs, D. Computational Tools for Investigating RNA-  
977 Protein Interaction Partners. *J Comput Sci Syst Biol* **6**, 182-187 (2013).
- 978 50. Parry, A., Rulands, S. & Reik, W. Active turnover of DNA methylation during cell fate  
979 decisions. *Nat Rev Genet* **22**, 59-66 (2021).
- 980 51. Anzalone, A.V. *et al.* Search-and-replace genome editing without double-strand breaks  
981 or donor DNA. *Nature* **576**, 149-157 (2019).
- 982 52. Jin, F., Li, Y., Ren, B. & Natarajan, R. PU.1 and C/EBP $\alpha$  synergistically program distinct  
983 response to NF- $\kappa$ B activation through establishing monocyte specific enhancers. *Proc Natl*  
984 *Acad Sci U S A* **108**, 5290-5295 (2011).
- 985 53. Peng, S.L. Transcription factors in autoimmune diseases. *Front Biosci* **13**, 4218-40 (2008).
- 986 54. Shin, H.Y. Targeting Super-Enhancers for Disease Treatment and Diagnosis. *Mol Cells* **41**,  
987 506-514 (2018).
- 988 55. Bell, C.C. *et al.* Targeting enhancer switching overcomes non-genetic drug resistance in  
989 acute myeloid leukaemia. *Nat Commun* **10**, 2723 (2019).
- 990 56. Hou, G. *et al.* SLE non-coding genetic risk variant determines the epigenetic dysfunction

- 991 of an immune cell specific enhancer that controls disease-critical microRNA expression.  
992 *Nat Commun* **12**, 135 (2021).
- 993 57. Hughes, J.R. *et al.* Analysis of hundreds of cis-regulatory landscapes at high resolution in  
994 a single, high-throughput experiment. *Nat Genet* **46**, 205-12 (2014).
- 995 58. Choi, J. *et al.* Evidence for additive and synergistic action of mammalian enhancers during  
996 cell fate determination. *Elife* **10**(2021).
- 997 59. Bulger, M. & Groudine, M. Functional and mechanistic diversity of distal transcription  
998 enhancers. *Cell* **144**, 327-39 (2011).
- 999 60. Chatterjee, S. *et al.* Enhancer Variants Synergistically Drive Dysfunction of a Gene  
1000 Regulatory Network In Hirschsprung Disease. *Cell* **167**, 355-368.e10 (2016).
- 1001 61. Carter, B. & Zhao, K. The epigenetic basis of cellular heterogeneity. *Nat Rev Genet* **22**,  
1002 235-250 (2021).

1003

### 1004 **Acknowledgment**

1005 This study was supported by grants from the National Natural Science Foundation of  
1006 China (31930037, 31630021 and 81102266), National Human Genetic Resources  
1007 Sharing Service Platform (2005DKA21300), Shanghai municipal key medical center  
1008 construction project (2017ZZ01024-002), Shenzhen Science and Technology Project  
1009 (JCYJ20180504170414637 and JCYJ20180302145033769), Shenzhen Futian Public  
1010 Welfare Scientific Research Project (FTWS2018005) and Sanming Project of Medicine  
1011 in Shenzhen (SZSM201602087).

1012

### 1013 **Author Contributions**

1014 N.S, GJ.H and T.Z designed the project. T.Z, GJ.H, XY.Z, YT.Z, YW.S and N.X  
1015 performed the experiments, YT.Q performed the ATAC-seq experiment. XY.Z and C.Y  
1016 performed analyzed the bioinformatics data. M.Z and Y.G analyzed the 4C-seq data.  
1017 YF.W, WL.Y, YJ.T and T.Z analyzed the genetic data. J.B.H, B.N., K.M.K., L.C.K. and  
1018 M.T.W analyzed the genetic association data and revised the manuscript. HH.D, XL.Z,

1019 H.X and JY.M collected human samples and performed analysis. N.S, GJ.H and T.Z

1020 prepared the manuscript.

1021

1022 **Competing Interests Statement**

1023 The authors declare no competing interests.

1024

1025

1026
